1 Symptoms at presentation for patients admitted to hospital with  
2 Covid-19: results from the ISARIC prospective multinational  
3 observational study

4

5 **Authors**

6 ISARIC Clinical Characterisation Group \*

7

8 \* Members listed at end of manuscript

9

10 **Keywords**

11 Covid-19, SARS-CoV-2, symptoms, diagnosis, case definition

12

13 **Running title**

14 Covid-19 symptoms at hospital admission

15

16 **Correspondence to**

17 Dr Mark G Pritchard

18 Centre for Tropical Medicine and Global Health, Nuffield Department of Medicine, University of

19 Oxford, Oxford, UK

20 mark.pritchard@ndm.ox.ac.uk

21

22 **Alternate corresponding author**

23 Professor Piero L Olliaro

24 Centre for Tropical Medicine and Global Health, Nuffield Department of Medicine, University of  
NOTE: This preprint reports new research that has not been certified by peer review and should not be used to guide clinical practice.

25 Oxford, Oxford, UK

26 piero.olliaro@ndm.ox.ac.uk

27

28 **Summary**

29 Typical symptoms of fever, cough and shortness of breath are less common in people admitted to

30 hospital with Covid-19 toward extremities of age. Published case definitions appear less sensitive

31 toward extremes of age, and atypical symptoms need to be recognised.

32

33

## 34 Abstract

### 35 Background

36 Symptom recognition is necessary to identify people with possible Covid-19. Clinical case definitions  
37 vary in type and number of symptoms included. No large studies have investigated how these  
38 perform for hospitalized patients of different ages and sex.

### 39 Methods

40 We used international prospective observational data from patients admitted to hospital with  
41 laboratory-confirmed Covid-19. We investigated how symptoms varied by age and sex. We  
42 performed logistic regression to assess the relationship of age and sex with the most prevalent  
43 symptoms in our dataset and with published case definitions, allowing for clustering by country as a  
44 random intercept.

### 45 Results

46 60 161 patients from 43 countries were included, with median age 70 years (interquartile range 55–  
47 82). Fever (68%), cough (68%) and shortness of breath (63%) were the most prevalent symptoms.  
48 Their prevalence was greater among patients aged 30–60 years (respectively 79%, 78%, 66%), and  
49 lower in children ( $\leq 18$  years: 68%, 47%, 22%) and older adults ( $\geq 70$  years: 61%, 62%, 61%). The most  
50 sensitive case definition assessed was one or more of cough, shortness of breath, fever, muscle  
51 pains or sore throat, met by 92% of the whole cohort. Confusion was the most prevalent symptom  
52 for patients whose symptoms did not meet any of the assessed case definitions. Regression models  
53 showed significant differences in symptoms with age, and considerable heterogeneity between  
54 countries.

### 55 Conclusions

56 Older adults and children admitted to hospital with Covid-19 are less likely to present with typical  
57 symptoms of cough, fever and shortness of breath. Vigilance for atypical symptoms towards  
58 extremities of age increases sensitivity of identifying Covid-19.

## 59 Background

60 For emerging infectious diseases, knowledge of symptoms is vital to identify people with possible  
61 infection and follow-up actions [1]. Details of exposures, symptoms, signs and investigations are  
62 combined into case definitions to classify suspected, probable and confirmed cases. These can be  
63 used for disease surveillance, to guide public health actions, and case management. In settings  
64 without microbiological testing, these criteria may be used to reach a clinical diagnosis; in settings  
65 where testing is available they may be used to guide testing strategies [2].

66 Covid-19 emerged in December 2019, caused by the severe acute respiratory syndrome  
67 coronavirus-2 (SARS-CoV-2) [3, 4]. The most frequently reported symptoms were fever, cough and  
68 shortness of breath, together with a range of less frequent symptoms [4-8]. Altered sense of taste  
69 and smell have been found to be strongly associated with Covid-19 [2, 9, 10]. The World Health  
70 Organization (WHO) surveillance case definition (used by the European and African Centres for  
71 Disease Control) for people who have been in a location with community transmission of Covid-19  
72 requires fever and at least one sign or symptom of respiratory disease, such as cough or shortness of  
73 breath [11]. The Centers for Disease Control and Prevention in the United States provides a non-  
74 exhaustive list of respiratory, enteric and constitutional symptoms: fever or chills, cough, shortness  
75 of breath or difficulty breathing, fatigue, muscle or body aches, headache, new loss of taste or smell,  
76 sore throat, congestion or runny nose, nausea or vomiting, and diarrhoea [12]. Public Health  
77 England's definition of a possible Covid-19 case in the community is any one of new continuous  
78 cough, high temperature, or change to sense of taste or smell [13]. For inpatients, their definition is  
79 evidence of pneumonia, acute respiratory distress syndrome, or one of two clusters of symptoms:  
80 fever with at least one of cough, hoarseness, nasal discharge or congestion, shortness of breath,  
81 sore throat, wheezing or sneezing; or any change in sense of taste or smell [13].

82 Despite Covid-19's status as a pandemic, large reports of clinical characteristics have so far  
83 been limited to cohorts from China, Europe and the United States [14]. There have also been no  
84 reports of differences in symptoms according to age or sex from large cohorts. Our primary

85 objective was to investigate how symptoms of patients admitted to hospital with confirmed Covid-  
86 19 vary by age and sex. Secondly we aimed to investigate how sensitivity of clinical case  
87 definitions varied among these populations, and to explore heterogeneity between countries.

## 88 Methods

### 89 Study design and setting

90 This analysis used international observational data of clinical features of patients admitted to  
91 hospital with Covid-19 between 30 January and 3 August 2020. The International Severe Acute  
92 Respiratory and emerging Infection Consortium (ISARIC)/WHO Clinical Characterisation Protocol for  
93 Severe Emerging Infections is a standardized protocol for investigation of severe acute infections by  
94 pathogens of public health interest [15]. The ISARIC case report forms [16] allow standardized data  
95 collection from the start of an outbreak and rapid dissemination of clinical information [4, 17-21].  
96 Different tiers of data collection exist to allow sites to collect data to the highest possible standards  
97 while recognising varying levels of resource for data collection during epidemics. Details of  
98 symptoms at admission were included on the case report forms for all tiers. Data were collected via  
99 electronic 'Core' and 'Rapid' forms by the ISARIC Clinical Characterisation Group, and through  
100 aligned forms by ISARIC-4C Coronavirus Clinical Characterisation Consortium in the United Kingdom  
101 [22] and the COVID-19 Critical Care Consortium [23]. Investigators from 41 countries are using  
102 Research electronic Data Capture (REDCap, version 8.11.11, Vanderbilt University, Nashville, Tenn.)  
103 to contribute their data to a central database hosted by the University of Oxford. Additional data  
104 were submitted by investigators from Malaysia, Russia [24] and Spain, who were not using the  
105 University of Oxford REDCap instance. All investigators retained full rights to their data.

### 106 Study population

107 Patients of any age admitted to hospital with suspected or confirmed Covid-19 were eligible for  
108 recruitment. Some versions of the case report form included specific criteria such as fever and  
109 cough, but investigators were able to include patients with a clinical suspicion of Covid-19 even if

110 these criteria were not met. This analysis was limited to patients who were admitted to hospital  
111 with symptomatic laboratory-confirmed Covid-19, according to sites' local diagnostic methods. We  
112 excluded asymptomatic patients who had been admitted to hospital for isolation and patients  
113 admitted for other conditions who subsequently developed Covid-19 symptoms.

#### 114 [Variables and measurement](#)

115 Variables used in this analysis were age, sex at birth, symptoms, date of symptoms onset, SARS-CoV-  
116 2 confirmation, and country of recruitment. To allow proportions to be calculated with a reliable  
117 denominator, only symptoms prespecified on the case report forms [16, 22, 23] were included in this  
118 analysis. The list of symptoms collected is presented with the results.

#### 119 [Ethical considerations](#)

120 This observational study required no change to clinical management and permitted enrolment in  
121 other research. The study was approved by the World Health Organization Ethics Review Committee  
122 (RPC571 and RPC572). Local ethics approval was obtained for each participating country and site  
123 according to local requirements.

#### 124 [Statistical methods](#)

125 Data were converted to Study Data Tabulation Model (version 1.7, Clinical Data Interchange  
126 Standards Consortium, Austin, Tex.) to allow inclusion of data submitted not using the ISARIC case  
127 report forms. We excluded patients with all symptoms recorded as missing or unknown, and those  
128 with missing age, sex, country or onset date.

129         Continuous variables were expressed as median with interquartile range, and categorical  
130 variables as counts with percentages. We tested for differences between female and male patients  
131 using Wilcoxon rank-sum tests for continuous variables and chi-square tests for categorical variables.  
132 We grouped patients into ten-year age bands (with a single group for age  $\geq 90$  years). We plotted  
133 the most frequently reported symptoms by age group, presenting missing data as a third category.

134 We collated symptoms according to four sets of clinical criteria, based on published case definitions  
135 [11-13]:

- 136 1. Fever plus at least one of cough or shortness of breath;
- 137 2. Fever plus at least one of cough, nasal discharge, shortness of breath, sore throat, or  
138 wheeze;
- 139 3. Either cough or fever;
- 140 4. One or more of cough, shortness of breath, fever, muscle pains, or sore throat.

141 (Altered senses of smell and taste were not included in these classifications as they were not  
142 included on all versions of the case report forms so had high levels of missingness.) Patients with  
143 missing details of any symptoms included in these criteria were omitted from the composite groups.  
144 We plotted proportions of patients meeting each set of criteria by ten-year age group, with 95%  
145 confidence intervals (CI) calculated using the Clopper–Pearson method.

146 We used logistic regression to identify associations of age and sex with the twelve most  
147 prevalent symptoms. Age group and sex were included as fixed effects, with country as a random  
148 intercept. To display heterogeneity between countries on the same scale as the fixed effects, we  
149 calculated median odds ratios (MOR) [25]. This quantifies variation between countries by comparing  
150 odds of an outcome between randomly chosen persons in different clusters who share the same  
151 covariates [25]. MORs are defined as a comparison of the group with greater propensity to the  
152 group with lower propensity, so lie in the range 1 to infinity [25]. We plotted the MOR to show the  
153 magnitude of the effect of heterogeneity and allow comparison with the fixed effects in our data.

154 79% of patients were recruited in a single country. As a sensitivity analysis, we repeated the  
155 analysis excluding patients from this country to see if results substantially changed. Finally, we  
156 plotted age-stratified symptom frequencies for each country with at least 250 patients.

157 No minimum sample size was calculated. All significance tests were two-tailed. Analyses  
158 were performed using R (version 3.6.2, R Foundation for Statistical Computing, Vienna, Austria) with  
159 packages including *binom*, *Epi*, *ggplot2*, *lme4*, *sjstats*, *tableone*, and *tidyverse*.

## 160 Results

161 Data were available for 99 623 patients. We excluded 24 336 who did not have documented SARS-  
162 CoV-2 confirmation, 2583 with missing data, and 5828 who developed Covid-19 after admission to  
163 hospital. 6715 (9.6%) were admitted to hospital with a diagnosis of asymptomatic Covid-19. The  
164 greatest proportion of asymptomatic patients was in the age-band 10–20 years (46%,  
165 Supplementary Figure 1). The greatest proportion of asymptomatic patients was in Malaysia (49%),  
166 where hospitalization was compulsory throughout the data collection period for people with Covid-  
167 19. After excluding asymptomatic patients, 60 161 patients remained in the dataset (Figure 1).  
168 Included patients were recruited from 394 sites in 43 countries (Supplementary Table 1). 47 332  
169 (79%) patients were included from the United Kingdom.

170 The median age of included patients was 70 years (interquartile range [IQR] 54–82; Table 1).  
171 930 (1.5%) were 18 years or younger. Of those older than 18 years, the median age was 70 years  
172 (IQR 55–82). The age distribution of patients varied among countries, between a median of 10 years  
173 in Poland, where a large proportion of included patients were children, and 73 years in the United  
174 Kingdom (Supplementary Figure 2). 34 674 (58%) patients were male.

175 The most frequently reported symptoms were fever, cough and shortness of breath (Table  
176 2). Fever, cough and shortness of breath were each significantly more prevalent in male patients,  
177 whereas less typical symptoms such as confusion, nausea and vomiting, diarrhoea, chest pain,  
178 headache and abdominal pain were more prevalent in female patients. The greatest sex-related  
179 difference was for nausea and vomiting, reported by 20% of female patients but only 14% of male  
180 patients. For most symptoms, the greatest prevalence was reported in adults aged between 30 and  
181 60 years, decreasing toward extremities of age (Figure 2). Frequency of fatigue and confusion  
182 increased with age. Large numbers of patients had missing data for anorexia, severe dehydration,  
183 altered sense of taste and smell, and inability to walk as these were not included on all case report  
184 forms. Excluding these symptoms, few patients had missing data for the most prevalent symptoms.

185 Data on symptoms included in the composite criteria were missing for 314 patients. The



186 clinical criteria were calculated for the remaining 59 847 participants. Each set of criteria was met by  
187 a greater proportion of patients aged 30 to 60 years than toward either extreme of age (Figure 3).  
188 The criteria of fever plus at least one of cough or shortness of breath was met by 35 394 (59%)  
189 patients, but only 37% of those aged 18 years and under, and 51% of those aged 70 years or over.  
190 The most sensitive criteria were one or more of cough, shortness of breath, fever, muscle pains, or  
191 sore throat, met by 55 198 (92%) participants. These criteria were met by 89% aged 18 years and  
192 under, and 89% of those aged 70 years or over. Each set of criteria were met by a greater  
193 proportion of male than female patients (Table 2).

194 For the 4649 patients whose symptoms did not meet any of the assessed case definitions,  
195 the most frequent symptom was confusion (49%; Table 3). This rose with age to 67% of those aged  
196 90 years or older. Nausea and vomiting, and abdominal pain were the most common symptoms for  
197 people less than 70 years old who did not meet any of the case definitions.

198 In the logistic regression models (Figure 4), similar associations between age and symptoms  
199 were seen after adjustment for sex and relationship of onset to admission date as in the unadjusted  
200 bar charts. Confusion increased with age. Nausea and vomiting, headache, abdominal pain, and  
201 sore throat were each more frequent in younger age groups, decreasing with age. The 95% CI for  
202 sex excluded one for most symptoms, but the point estimate was close to one for most. In these  
203 analyses, male patients had greater odds of fever, cough and shortness of breath, and lower odds of  
204 gastrointestinal symptoms of nausea and vomiting, diarrhoea, abdominal pain, chest pain, headache  
205 and sore throat. The median odds ratio for heterogeneity between countries was greater than the  
206 relationship with sex in all symptoms. It was of similar magnitude to the relationship with age for  
207 most symptoms. For each symptom, heterogeneity between countries was of a similar magnitude to  
208 the effect of age, and a greater magnitude than sex.

209 When we repeated the analysis excluding patients from the United Kingdom, the patterns of  
210 symptoms were similar to the main analysis (Supplementary Figure 3). The peak prevalence of  
211 fever, cough and shortness of breath was in 70- to 80-year-olds, and fatigue increased with age. This

212 resulted in a change to the calculated sensitivity of the clinical case definitions. Below the age of 50  
213 years, each was less sensitive in the analysis excluding the United Kingdom than in the analysis  
214 including it; above the age of 70 years each was more sensitive (grey lines in Figure 3). Within  
215 countries, the baseline prevalence of each symptom varied but patterns within countries were  
216 broadly similar to the overall results (Supplementary figures 4–15).

## 217 Discussion

218 In this large, multinational cohort, we found that symptoms for people admitted to hospital with  
219 Covid-19 varied by age and sex. Typical symptoms of fever, cough and shortness of breath were  
220 each more prevalent between the ages of 30 and 60 years. Commonly used clinical case definitions  
221 identified greater proportions of patients between the ages of 30 and 60 years, and fewer in  
222 childhood and older age.

223 This is the first large assessment of Covid-19 symptoms by age. The presence of atypical  
224 symptoms in older adults has been recognised [26] but not evaluated in a large international cohort.  
225 Liu and colleagues [27] found similar distributions of symptoms between older and younger patients  
226 with Covid-19, but their older cohort had a median age of 68 years, which is younger than the  
227 median age of our total cohort. The finding of atypical presentations among older patients with  
228 Covid-19 correlates with similar findings of atypical presentations for pneumonia, bacteraemia and  
229 coronary artery disease [28, 29]. Lower prevalence of symptoms in children and young people has  
230 been recognised [30, 31], but no large international cohorts collecting data systematically from both  
231 adults and children been reported. Separate analyses on the ISARIC-4C data have identified  
232 clustering of symptoms in children [32] and adults [33]. In each, fever, cough and shortness of  
233 breath clustered as frequently co-occurring symptoms [32, 33]. In children, the next most frequent  
234 cluster consisted of systemic, enteric and mucocutaneous symptoms [32]; for adults, other clusters  
235 consisted of non-specific viral symptoms, gastrointestinal symptoms, upper respiratory symptoms,  
236 neurological symptoms, and symptoms of bronchospasm [33]. These data were included in this

237 global dataset so the results of these analyses are not independent of our results.

238           The differences in symptoms by sex were statistically significant but generally of small  
239 magnitude. Adjusted for sex and country, the common symptoms of fever, cough and shortness of  
240 breath were more common in male patients, whereas all other symptoms were equal or more  
241 common in female patients. A cohort of non-hospitalized patients with Covid-19 in Poland found  
242 greater differences in symptoms of lack of appetite (55% of women, 36% of men) and taste disorder  
243 (53% women, 40% men) [34].

244           Our results suggest considerable heterogeneity among countries. We have not attempted  
245 to elicit reasons for heterogeneity, which may include differences in how patients present to  
246 hospital, how they describe their symptoms, and hospitals' criteria for admission and testing. It  
247 might also reflect differential recruitment to the study, as sites in some countries were unable to  
248 recruit confused patients due to requirements for consent, whereas in other countries the  
249 requirement for consent had been waived or assent could be obtained from a proxy. An  
250 international review of reported Covid-19 symptoms [14] found substantial variation. We explored  
251 the effect of this heterogeneity in the regression models using country as a random effect, and by  
252 repeating the analysis excluding the largest country. Each suggested an underlying pattern of lower  
253 frequencies of typical symptoms in children and older adults. Therefore, although the prevalence of  
254 each symptom reported in this study may not generalize to all settings, we have evidence to support  
255 the need to be alert to age-dependent differences across countries.

256           The size of this cohort is a strength. However, more than 80% of patients were recruited in a  
257 single country, and less than 1% of patients were recruited from lower-middle or low-income  
258 countries. The cohort also represents older age groups better than young ones, with only 1.8% of  
259 the cohort aged 18 years or younger. Combined with the known heterogeneity between countries,  
260 this limits the generalizability of estimates of symptom prevalence. More broadly, there is a  
261 shortage of information to guide practice outside high-income countries: a recent scoping review of  
262 clinical characteristics of Covid-19 identified no large cohorts in non-high-income countries except

263 China [14].

264 This analysis included only patients who were admitted to hospital and tested for SARS-CoV-  
265 2. This patient population is more likely to be severely unwell and more likely to exhibit symptoms  
266 typically associated with Covid-19 than people who are being managed in the community or whose  
267 disease has not been recognised. This might suggest that the reporting of 'typical' Covid-19  
268 symptoms in this cohort is likely to be an overestimate of the population prevalence. Symptoms  
269 associated with less severe disease might be underestimated in this cohort. Symptoms are  
270 subjective and cannot be externally verified. Some differences for children may reflect that  
271 symptoms could only be recorded if a caregiver recognised the symptom or the child had the  
272 appropriate vocabulary to describe it. Similarly, some symptoms may be under-reported in elderly  
273 patients if there are difficulties in communication, for example due to delirium.

274 The absence of a control group of patients without Covid-19 in this dataset prevented  
275 estimation of specificity or positive and negative predictive values. This prevents us from advocating  
276 changes to clinical case definitions, as such decisions inevitably require a balance of false-positive  
277 and false-negative rates.

278 Our results suggest that reliance on clinical case definitions may result in missing cases of  
279 Covid-19, especially among children and older adults. While healthcare professionals assessing  
280 patients can make a broader assessment of a patient's condition, non-healthcare professionals  
281 making decisions regarding isolation or exclusion from activities may adhere to the criteria more  
282 strictly. Reported prevalence of Covid-19 may also rely on strict interpretation of case definitions. In  
283 settings where comprehensive contact tracing is planned, or there is easy access to microbiological  
284 testing, a highly sensitive case definition is desirable. However, where decisions are based on clinical  
285 diagnoses, it is important to recognise other pathogens that can cause similar constellations of  
286 symptoms. This is particularly important if a treatment could be offered for an alternative diagnosis,  
287 such as influenza. Addition of symptoms such as confusion or gastrointestinal symptoms to the  
288 Covid-19 case definition could increase sensitivity, but at a cost of reduced specificity. Changes in

289 the senses of taste and smell have recently been added to case definitions. Our data suggest that  
290 these criteria would detect only a small proportion of patients admitted to hospital with Covid-19  
291 who were not included by other definitions.

292 These results highlight the need to consider Covid-19 even if individuals do not display  
293 typical symptoms of the disease. This is especially the case in children and older adults. Given that  
294 our results are likely to overestimate the sensitivity of the clinical criteria currently used to identify  
295 patients for SARS-CoV-2 testing, our results suggest a lower limit to the proportion of people in the  
296 community with Covid-19 who would not be identified. Addition of confusion as a symptom would  
297 increase the sensitivity of case definitions for older adults; and inclusion of nausea and vomiting or  
298 abdominal pain would increase sensitivity for children and young adults. The high proportion of  
299 asymptomatic patients identified in patients aged 10 to 30 years, in spite of this cohort not being  
300 eligible for hospital admission in many countries, suggests that universal screening in these ages  
301 could be beneficial when there is widespread community circulation of Covid-19. Ongoing data  
302 collection outside high-income countries is needed to establish whether alternative case definitions  
303 are needed in different settings. Work is also ongoing to determine whether some constellations of  
304 symptoms are associated with better or poorer outcomes than others.

## 305 ISARIC Clinical Characterisation Group

306 Sheryl Ann Abdukahil, Ryuzo Abe, Laurent Abel, Lara Absil, Andrew Acker, Shingo Adachi, Elisabeth  
307 Adam, Diana Adrião, Kate Ainscough, Ali Ait Hssain, Younes Ait Tamlihat, Takako Akimoto, Tala Al-  
308 Dabbous, Abdulrahman Al-Fares, Eman Al Qasim, Razi Alalqam, Beatrice Alex, Kévin Alexandre, Huda  
309 Alfoudri, Kazali Enagnon Alidjnou, Jeffrey Aliudin, Clotilde Allavena, Nathalie Allou, João Alves, Rita  
310 Alves, Maria Amaral, Heidi Ammerlaan, Phoebe Ampaw, Roberto Andini, Claire Andrejak, Andrea  
311 Angheben, François Angoulvant, Séverine Ansart, Massimo Antonelli, Carlos Alexandre Antunes De  
312 Brito, Yaseen Arabi, Irene Aragao, Antonio Arcadipane, Lukas Arenz, Jean-Benoît Arlet, Christel  
313 Arnold-Day, Lovkesh Arora, Elise Artaud-Macari, Angel Asensio, Jean Baptiste Assie, Anika Atique,

314 Johann Auchabie, Hugues Aumaitre, Laurène Azemar, Cécile Azoulay, Benjamin Bach, Delphine  
315 Bachelet, J. Kenneth Baillie, Erica Bak, Agamemnon Bakakos, Firouzé Banisadr, Renata Barbalho,  
316 Wendy S. Barclay, Michaela Barnikel, Audrey Barrelet, Cleide Barrigoto, Romain Basmaci, Diego  
317 Fernando Bautista Rincon, Alexandra Bedossa, Sylvie Behilill, Aleksandr Beljantsev, David Bellemare,  
318 Anna Beltrame, Marine Beluze, Nicolas Benech, Dehbia Benkerrou, Suzanne Bennett, Luís Bento,  
319 Jan-Erik Berdal, Delphine Bergeaud, Lorenzo Bertolino, Simon Bessis, Sybille Bevilacqua, Krishna  
320 Bhavsar, Felwa Bin Humaid, François Bissuel, Patrick Biston, Laurent Bitker, Pablo Blanco-Schweizer,  
321 Mathieu Blot, Filomena Boccia, Debby Bogaert, François Bompard, Gareth Booth, Diogo Borges,  
322 Raphaël Borie, Jeannet Bos, Hans Martin Bosse, Elisabeth Botelho-Nevers, Lila Bouadma, Olivier  
323 Bouchaud, Sabelline Bouchez, Dounia Bouhmani, Damien Bouhour, Kévin Bouiller, Laurence Bouillet,  
324 Camille Bouisse, Anne-Sophie Boureau, Maude Bouscambert, Jason Bouziotis, Bianca Boxma,  
325 Marielle Boyer-Besseyre, Maria Boylan, Cynthia Braga, Timo Brandenburger, Luca Brazzi, Dorothy  
326 Breen, Patrick Breen, Kathy Brickell, Nicolas Brozzi, Nina Buchtele, Christian Buesaquillo, Polina  
327 Bugaeva, Marielle Buisson, Erlina Burhan, Ingrid G. Bustos, Denis Butnaru, Sheila Cárcel, André  
328 Cabie, Susana Cabral, Eder Caceres, Mia Callahan, Kate Calligy, Jose Andres Calvache, João Camões,  
329 Valentine Campana, Paul Campbell, Cecilia Canepa, Mireia Cantero, Pauline Caraux-Paz, Filipa  
330 Cardoso, Filipe Cardoso, Sofia Cardoso, Simone Carelli, Nicolas Carlier, Gayle Carney, Chloe  
331 Carpenter, Marie-Christine Carret, François Martin Carrier, Gail Carson, Maire-Laure Casanova,  
332 Mariana Cascão, José Casimiro, Bailey Cassandra, Silvia Castañeda, Nidyanara Castanheira, Guylaine  
333 Castor-Alexandre, Henry Castrillón, Ivo Castro, Ana Catarino, François-Xavier Catherine, Roberta  
334 Cavalin, Giulio Giovanni Cavalli, Alexandros Cavayas, Adrian Ceccato, Minerva Cervantes-Gonzalez,  
335 Anissa Chair, Catherine Chakveatze, Adrienne Chan, Meera Chand, Julie Chas, Camille Chassin,  
336 Anjellica Chen, Yih-Sharng Chen, Matthew Pellan Cheng, Antoine Cheret, Thibault Chiarabini, Julian  
337 Chica, Catherine Chirouze, Davide Chiumello, Hwa Jin Cho, Sung Min Cho, Bernard Cholley, Jose  
338 Pedro Cidade, Jose Miguel Cisneros Herreros, Barbara Wanjiru Citarella, Anna Ciullo, Jennifer Clarke,  
339 Sara Clohisey, Cassidy Codan, Caitriona Cody, Alexandra Coelho, Gwenhaël Colin, Michael Collins,

340 Sebastiano Maria Colombo, Pamela Combs, JP Connelly, Marie Connor, Anne Conrad, Sofía  
341 Contreras, Graham S. Cooke, Mary Copland, Hugues Cordel, Amanda Corley, Sarah Cormican, Sabine  
342 Cornelis, Arianne Joy Corpuz, Grégory Corvaisier, Camille Couffignal, Sandrine Couffin-Cadiergues,  
343 Roxane Courtois, Charles Crepy D'Orleans, Sabine Croonen, Gloria Crawl, Jonathan Crump, Claudina  
344 Cruz, Marc Csete, Alberto Cucino, Caroline Cullen, Matthew Cummings, Gerard Curley, Elodie Curlier,  
345 Paula Custodio, Frédérick D'Aragon, Ana Da Silva Filipe, Charlene Da Silveira, Eric D'Ortenzio, Al-  
346 Awwab Dabaliz, Heidi Dalton, Jo Dalton, Nick Daneman, Emmanuelle A. Dankwa, Jorge Dantas,  
347 Nathalie De Castro, Diego De Mendoza, Rafael Freitas De Oliveira França, Rosanna De Rosa, Thushan  
348 De Silva, Peter De Vries, David Dean, Marie-Pierre Debray, William Dechert, Lauren Deconninck,  
349 Romain Decours, Isabelle Delacroix, Karen Delavigne, Ionna Deligiannis, Andrea Dell'amore, Pierre  
350 Delobel, Elisa Demonchy, Emmanuelle Denis, Dominique Deplanque, Dominique Deplanque, Pieter  
351 Depuydt, Mehul Desai, Diane Descamps, Mathilde Desvallée, Santi Rahayu Dewayanti, Alpha Diallo,  
352 Sylvain Diamantis, André Dias, Juan Jose Diaz Diaz, Rodrigo Diaz, Kévin Didier, Jean-Luc Diehl, Wim  
353 Dieperink, Jérôme Dimet, Vincent Dinot, Alphonsine Diouf, Yael Dishon, Félix Djossou, Annemarie B.  
354 Docherty, Andy Dong, Christl A. Donnelly, Maria Donnelly, Chloe Donohue, Céline Dorival, James  
355 Joshua Douglas, Renee Douma, Nathalie Dournon, Triona Downer, Mark Downing, Tom Drake,  
356 Vincent Dubee, François Dubos, Alexandra Ducancelle, Susanne Dudman, Jake Dunning, Emanuele  
357 Durante Mangoni, Silvia Duranti, Lucian Durham III, Bertrand Dussol, Xavier Duval, Anne Margarita  
358 Dyrhol-Riise, Carla Eira, José Ernesto Vidal, Mohammed El Sanharawi, Subbarao Elapavaluru, Brigitte  
359 Elharrar, Natalie Elkheir, Jacobien Ellerbroek, Rachael Ellis, Philippine Eloy, Tarek Elshazly, Isabelle  
360 Enderle, Ilka Engelmann, Vincent Enouf, Olivier Epaulard, Mariano Esperatti, Hélène Esperou, Marina  
361 Esposito-Farese, João Estevão, Manuel Etienne, Manuel Etienne, Nadia Ettalhaoui, Anna Greti  
362 Everding, Mirjam Evers, Isabelle Fabre, Amna Faheem, Arabella Fahy, Cameron J. Fairfield, Pedro  
363 Faria, Nataly Farshait, Arie Zainul Fatoni, Karine Faure, Mohamed Fayed, Niamh Feely, Jorge  
364 Fernandes, Marília Fernandes, Susana Fernandes, Joana Ferrão, Eglantine Ferrand Devouge, Mário  
365 Ferraz, Benigno Ferreira, Ricard Ferrer-Roca, Claudia Figueiredo-Mello, Clara Fleteau, Tom Fletcher,

366 Letizia Lucia Florio, Claire Foley, Victor Fomin, Claudio Duarte Fonseca, Tatiana Fonseca, Patricia  
367 Fontela, Simon Forsyth, Giuseppe Foti, Erwan Fourn, Rob Fowler, Diego Franch-Llasat, Christophe  
368 Fraser, John Fraser, Marcela Vieira Freire, Ana Freitas Ribeiro, Caren Friedrich, Stéphane Fry, Nora  
369 Fuentes, Masahiro Fukuda, Joan Gómez-Junyent, Valérie Gaborieau, Benoît Gachet, Rostane Gaci,  
370 Massimo Gagliardi, Jean-Charles Gagnard, Amandine Gagneux-Brunon, Sérgio Gaião, Phil Gallagher,  
371 Elena Gallego Curto, Carrol Gamble, Arthur Garan, Esteban Garcia-Gallo, Rebekha Garcia, Denis  
372 Garot, Valérie Garrait, Nathalie Gault, Aisling Gavin, Alexandre Gaymard, Johannes Gebauer, Louis  
373 Gerbaud Morlaes, Nuno Germano, Jade Ghosn, Marco Giani, Carlo Giaquinto, Jess Gibson, Tristan  
374 Gigante, Morgane Gilg, Guillermo Giordano, Michelle Girvan, Valérie Gissot, Gezy Giwangkencana,  
375 Daniel Glikman, Petr Glybochko, Eric Gnall, Geraldine Goco, François Goehringer, Siri Goepel, Jean-  
376 Christophe Goffard, Jonathan Golob, Isabelle Gorenne, Cécile Goujard, Tiphaine Goulenok, Margarite  
377 Grable, Edward Wilson Grandin, Pascal Granier, Giacomo Grasselli, Christopher A. Green, William  
378 Greenhalf, Segolène Greffe, Domenico Luca Grieco, Matthew Griffee, Fiona Griffiths, Ioana Grigoras,  
379 Albert Groenendijk, Anja Grosse Lordemann, Heidi Gruner, Yusing Gu, Jérémie Guedj, Dewi Guellec,  
380 Anne-Marie Guerguerian, Daniela Guerreiro, Romain Guery, Anne Guillaumot, Laurent Guilleminault,  
381 Thomas Guimard, Daniel Haber, Sheeba Hakak, Matthew Hall, Sophie Halpin, Ansley Hamer, Rebecca  
382 Hamidfar, Terese Hammond, Hayley Hardwick, Kristen Harley, Ewen M. Harrison, Janet Harrison,  
383 Leanne Hays, Jan Heerman, Lars Heggelund, Ross Hendry, Martina Hennessy, Aquiles Henriquez-  
384 Trujillo, Maxime Hentzien, Jaime Hernandez-Montfort, Astarini Hidayah, Dawn Higgins, Eibhilin  
385 Higgins, Samuel Hinton, Ana Hipólito -Reis, Hiroaki Hiraiwa, Julian A. Hiscox, Antonia Ying Wai Ho,  
386 Alexandre Hoctin, Isabelle Hoffmann, Oscar Hoiting, Rebecca Holt, Jan Cato Holter, Peter Horby,  
387 Juan Pablo Horcajada, Koji Hoshino, Kota Hoshino, Catherine L. Hough, Jimmy Ming-Yang Hsu, Jean-  
388 Sébastien Hulot, Samreen Ijaz, Hajnal-Gabriela Illes, Hugo Inácio, Carmen Infante Dominguez, Elias  
389 Iosifidis, Lacey Irvine, Sarah Isgett, Tiago Isidoro, Margaux Isnard, Junji Itai, Daniel Ivulich, Salma  
390 Jaafoura, Julien Jabot, Clare Jackson, Nina Jamieson, Stéphane Jaureguiberry, Jeffrey Javidfar, Zabbe  
391 Jean- Benoît, Florence Jego, Synne Jenum, Ruth Jimbo Sotomayor, Ruth Noemí Jorge García, Cédric



392 Joseph, Mark Joseph, Philippe Jouvét, Hanna Jung, Ouifiya Kafif, Florentia Kaguelidou, Sabina Kali,  
393 Smaragdi Kalomoiri, Darshana Hewa Kandamby, Chris Kandel, Ravi Kant, Christiana Kartsonaki,  
394 Daisuke Kasugai, Kevin Katz, Simreen Kaur Johal, Sean Keating, Andrea Kelly, Sadie Kelly, Lisa  
395 Kennedy, Kalynn Kennon, Younes Kerroumi, Evelyne Kestelyn, Imrana Khalid, Antoine Khalil, Coralie  
396 Khan, Irfan Khan, Michelle E Kho, Saye Khoo, Yuri Kida, Peter Kiiza, Anders Benjamin Kildal, Antoine  
397 Kimmoun, Detlef Kindgen-Milles, Nobuya Kitamura, Paul Klenerman, Gry Kloumann Bekken, Stephen  
398 Knight, Robin Kobbe, Malte Kohns Vasconcelos, Volkan Korten, Caroline Kosgei, Karolina Krawczyk,  
399 Pavan Kumar Vecham, Deepali Kumar, Ethan Kurtzman, Demetrios Kutsogiannis, Konstantinos  
400 Kyriakoulis, Erwan L'her, Marie Lachatre, Marie Lacoste, John G Laffey, Marie Lagrange, Fabrice  
401 Laine, Marc Lambert, François Lamontagne, Marie Langelot-Richard, Eka Yudha Lantang, Marina  
402 Lanza, Cédric Laouénan, Samira Laribi, Delphine Lariviere, Odile Launay, Yoan Lavie-Badie, Andrew  
403 Law, Clément Le Bihan, Cyril Le Bris, Eve Le Coustumier, Georges Le Falher, Sylvie Le Gac, Quentin Le  
404 Hingrat, Marion Le Maréchal, Soizic Le Mestre, Vincent Le Moing, Hervé Le Nagard, Paul Le Turnier,  
405 Rafael León, Minh Le, Marta Leal Santos, Ema Leal, James Lee, Su Hwan Lee, Todd Lee, Gary  
406 Leeming, Bénédicte Lefebvre, Laurent Lefebvre, Benjamin Lefevre, François Lellouche, Adrien  
407 Lemaïgnen, Véronique Lemee, Gretchen Lemmink, Michela Leone, Quentin Lepiller, François-Xavier  
408 Lescuré, Olivier Lesens, Mathieu Lesouhaitier, Claire Levy-Marchal, Bruno Levy, Yves Levy, Gianluigi  
409 Li Bassi, Janet Liang, Wei Shen Lim, Bruno Lina, Andreas Lind, Guillaume Lingas, Sylvie Lion-Daolio,  
410 Keibun Liu, Antonio Loforte, Navy Lolong, Diogo Lopes, Dalia Lopez-Colon, Paul Loubet, Jean  
411 Christophe Lucet, Carlos M. Luna, Olguta Lungu, Liem Luong, Dominique Luton, Ruth Lyons, Fredrik  
412 Müller, Karl Erik Müller, Olavi Maasikas, Sarah Macdonald, Moïse Machado, Gabrielle Macheda, Juan  
413 Macias Sanchez, Jai Madhok, Rafael Mahieu, Sophie Mahy, Lars Siegfried Maier, Mylène Maillet,  
414 Thomas Maitre, Maximilian Malferttheiner, Nadia Malik, Fernando Maltez, Denis Malvy, Marina  
415 Mambert, Victoria Manda, Jose M. Mandei, Edmund Manning, Aldric Manuel, Ceila Maria Sant`Ana  
416 Malaque, Flávio Marino, Carolline De Araújo Mariz, Charbel Maroun Eid, Ana Marques, Catherine  
417 Marquis, Brian Marsh, Laura Marsh, John Marshall, Celina Turchi Martelli, Guillaume Martin-Blondel,

418 Ignacio Martin-Loeches, Alejandro Martin-Quiros, Dori-Ann Martin, Emily Martin, Martin Martinot,  
419 Caroline Martins Rego, Ana Martins, João Martins, Gennaro Martucci, Eva Miranda Marwali, Juan  
420 Fernando Masa Jimenez, David Maslove, Sabina Mason, Moshe Matan, Daniel Mathieu, Mathieu  
421 Mattei, Romans Matulevics, Laurence Maulin, Natalie Mc Evoy, Aine McCarthy, Anne McCarthy,  
422 Colin McCloskey, Rachael McConnochie, Sherry McDermott, Sarah McDonald, Samuel McElwee,  
423 Natalie McEvoy, Allison McGeer, Niki McGuinness, Kenneth A. McLean, Bairbre McNicholas, Edel  
424 Meaney, Cécile Mear-Passard, Maggie Mechlin, Ferruccio Mele, Kusum Menon, France Mentré,  
425 Alexander J. Mentzer, Noémie Mercier, Antoine Merckx, Blake Mergler, Laura Merson, António  
426 Mesquita, Agnès Meybeck, Alison M. Meynert, Vanina Meyssonier, Amina Meziane, Medhi Mezidi,  
427 Céline Michelanglei, Vladislav Mihnovitš, Hugo Miranda Maldonado, Mary Mone, Asma Moin, David  
428 Molina, Elena Molinos, Agostinho Monteiro, Claudia Montes, Giorgia Montrucchio, Sarah Moore,  
429 Shona C. Moore, Lina Morales-Cely, Lucia Moro, Diego Rolando Morocho Tutillo, Ana Motos, Hugo  
430 Mouquet, Clara Mouton Perrot, Julien Moyet, Jimmy Mullaert, Daniel Munblit, Derek Murphy,  
431 Marlène Murriss, Dimitra Melia Myrodia, Yohan N’guyen, Nadège Neant, Holger Neb, Nikita A  
432 Nekliudov, Raul Neto, Emily Neumann, Bernardo Neves, Pauline Yeung Ng, Wing Yiu Ng, Orna Ni  
433 Choileain, Alistair Nichol, Stephanie Nonas, Marion Noret, Lisa Norman, Alessandra Notari, Mahdad  
434 Noursadeghi, Karolina Nowicka, Saad Nseir, Jose I Nunez, Elsa Nyamankolly, Max O’Donnell, Katie  
435 O’Hearn, Conar O’Neil, Giovanna Occhipinti, Tawnya Ogston, Takayuki Ogura, Tak-Hyuk Oh,  
436 Shinichiro Ohshimo, Budha Charan Singh Oinam, Ana Pinho Oliveira, João Oliveira, Piero Olliaro,  
437 David S. Y. Ong, Wilna Oosthuyzen, Peter J.M. Openshaw, Claudia Milena Orozco-Chamorro, Andrés  
438 Orquera, Javier Osatnik, Nadia Ouamara, Rachida Ouissa, Clark Owyang, Eric Oziol, Diana Póvoas,  
439 Maïder Pagadoy, Justine Pages, Mario Palacios, Massimo Palmarini, Giovanna Panarello, Prasan  
440 Kumar Panda, Mauro Panigada, Nathalie Pansu, Aurélie Papadopoulos, Briseida Parra, Jérémie  
441 Pasquier, Fabian Patauner, Luís Patrão, Christelle Paul, Mical Paul, Jorge Paulos, William A. Paxton,  
442 Jean-François Payen, India Pearse, Giles J Peek, Florent Peelman, Nathan Peiffer-Smadja, Vincent  
443 Peigne, Mare Pejkovska, Ithan D. Peltan, Rui Pereira, Daniel Perez, Thomas Perpoint, Antonio

444 Pesenti, Lenka Petroušová, Ventzislava Petrov-Sanchez, Gilles Peytavin, Scott Pharand, Michael  
445 Piagnerelli, Walter Picard, Olivier Picone, Marie Piel-Julian, Carola Pierobon, Carlos Pimentel, Lionel  
446 Piroth, Riinu Pius, Simone Piva, Laurent Plantier, Daniel Plotkin, Julien Poissy, Maria Pokorska-  
447 Spiewak, Sergio Poli, Georgios Pollakis, Jolanta Popielska, Douwe F. Postma, Pedro Pova, Jeff Powis,  
448 Sofia Prapa, Christian Prebensen, Jean-Charles Preiser, Vincent Prestre, Nicholas Price, Anton  
449 Prinssen, Mark G. Pritchard, Lúcia Proença, Oriane Puéchal, Gregory Purcell, Luisa Quesada, Else  
450 Quist-Paulsen, Mohammed Quraishi, Indrek Rätsep, Bernhard Rössler, Christian Rabaud, Marie  
451 Rafiq, Gabrielle Ragazzo, Fernando Rainieri, Nagarajan Ramakrishnan, Kollengode Ramanathan,  
452 Blandine Rammaert, Christophe Rapp, Menaldi Rasmin, Cornelius Rau, Stanislas Rebaudet, Sarah  
453 Redl, Brenda Reeve, Liadain Reid, Renato Reis, Jonathan Remppis, Martine Remy, Hanna Renk,  
454 Liliana Resende, Anne-Sophie Resseguier, Matthieu Revest, Oleksa Rewa, Luis Felipe Reyes, David  
455 Richardson, Denise Richardson, Laurent Richier, Jordi Riera, Ana Lúcia Rios, Asgar Rishu, Patrick  
456 Rispal, Karine Risso, Maria Angelica Rivera Nuñez, Nicholas Rizer, André Roberto, Stephanie Roberts,  
457 David L. Robertson, Olivier Robineau, Ferran Roche-Campo, Paola Rodari, Simão Rodeia, Julia  
458 Rodriguez Abreu, Emmanuel Roilides, Amanda Rojek, Juliette Romaru, Roberto Roncon-Albuquerque  
459 Jr, Mélanie Roriz, Manuel Rosa-Calatrava, Michael Rose, Dorothea Rosenberger, Andrea Rossanese,  
460 Bénédicte Rossignol, Patrick Rossignol, Carine Roy, Benoît Roze, Clark D. Russell, Steffi Ryckaert,  
461 Aleksander Rygh Holten, Xavier Sánchez Choez, Isabela Saba, Musharaf Sadat, Nadia Saidani,  
462 Leonardo Salazar, Gabriele Sales, Stéphane Sallaberry, Hélène Salvator, Angel Sanchez-Miralles,  
463 Olivier Sanchez, Vanessa Sancho-Shimizu, Gyan Sandhu, Oana Sandulescu, Marlene Santos, Shirley  
464 Sarfo-Mensah, Benjamine Sarton, Egle Saviciute, Parthena Savvidou, Joshua Scarsbrook, Tjard  
465 Schermer, Arnaud Scherpereel, Marion Schneider, Stephan Schroll, Michael Schwameis, James Scott-  
466 Brown, Janet T. Scott, Nicholas Sedillot, Tamara Seitz, Caroline Semaille, Malcolm G. Semple, Eric  
467 Senneville, Filipa Sequeira, Tânia Sequeira, Ellen Shadowitz, Mohammad Shamsah, Pratima Sharma,  
468 Catherine A. Shaw, Victoria Shaw, Nisreen Shiban, Nobuaki Shime, Hiroaki Shimizu, Keiki Shimizu,  
469 Sally Shrapnel, Hoi Ping Shum, Nassima Si Mohammed, Louise Sigfrid, Catarina Silva, Maria Joao

470 Silva, Wai Ching Sin, Vegard Skogen, Sue Smith, Benjamin Smood, Michelle Smyth, Morgane  
471 Snacken, Dominic So, Monserrat Solis, Joshua Solomon, Tom Solomon, Emily Somers, Agnès  
472 Sommet, Myung Jin Song, Rima Song, Tae Song, Michael Sonntagbauer, Edouard Soum, Maria Sousa  
473 Uva, Marta Sousa, Vicente Souza-Dantas, Alexandra Sperry, Shiranee Sriskandan, Thomas  
474 Staudinger, Stephanie-Susanne Stecher, Ymkje Stienstra, Birgitte Stiksrud, Adrian Streinu-Cercel,  
475 Anca Streinu-Cercel, Samantha Strudwick, Ami Stuart, David Stuart, Asfia Sultana, Charlotte  
476 Summers, Magdalena Surovcová Andrey A Svistunov, Konstantinos Syrigos, Jaques Sztajnbok,  
477 Konstanty Szuldrzynski, François Téoulé, Shirin Tabrizi, Lysa Tagherset, Ewa Talarek, Sara Taleb,  
478 Jelmer Talsma, Le Van Tan, Hiroyuki Tanaka, Taku Tanaka, Hayato Taniguchi, Coralie Tardivon, Pierre  
479 Tattevin, M Azhari Taufik, Richard S. Tedder, João Teixeira, Marie-Capucine Tellier, Pleun Terpstra,  
480 Olivier Terrier, Nicolas Terzi, Hubert Tessier-Grenier, Vincent Thibault, Simon-Djamel Thiberville,  
481 Benoît Thill, A.A. Roger Thompson, Shaun Thompson, David Thomson, Emma C. Thomson, Duong  
482 Bich Thuy, Ryan S. Thwaites, Peter S. Timashev, Jean-François Timsit, Bharath Kumar Tirupakuzhi  
483 Vijayaraghavan, Maria Toki, Kristian Tonby, Rosario Maria Torres Santos-Olmo, Antoni Torres,  
484 Margarida Torres, Théo Trioux, Huynh Trung Trieu, Cécile Tromeur, Ioannis Trontzas, Jonathan  
485 Troost, Tiffany Trouillon, Christelle Tual, Sarah Tubiana, Helen Tuite, Lance C.W. Turtle, Pawel  
486 Twardowski, Makoto Uchiyama, Roman Ullrich, Alberto Uribe, Asad Usman, Luís Val-Flores, Stijn Van  
487 De Velde, Marcel Van Den Berge, Machteld Van Der Feltz, Nicky Van Der Vekens, Peter Van Der  
488 Voort, Sylvie Van Der Werf, Marlice Van Dyk, Laura Van Gulik, Jarne Van Hattem, Steven Van  
489 Lelyveld, Carolien Van Netten, Noémie Vanel, Henk Vanoverschelde, Charline Vauchy, Aurélie  
490 Veislinger, Jorge Velazco, Sara Ventura, Annelies Verbon, César Vieira, Joy Ann Villanueva, Judit  
491 Villar, Pierre-Marc Villeneuve, Andrea Villoldo, Nguyen Van Vinh Chau, Benoit Visseaux, Hannah  
492 Visser, Aapeli Vuorinen, Fanny Vuotto, Chih-Hsien Wang, Jia Wei, Katharina Weil, Sanne Wesselius,  
493 Murray Wham, Bryan Whelan, Nicole White, Aurélie Wiedemann, Keith Wille, Evert-Jan Wils, Ioannis  
494 Xynogalas, Jacky Y Suen, Sophie Yacoub, Masaki Yamazaki, Yazdan Yazdanpanah, Cécile Yelnik,  
495 Stephanie Yerkovich, Toshiki Yokoyama, Hodane Yonis, Paul Young, Saptadi Yulianto, Marion Zabbe,

496 Kai Zacharowski, Maram Zahran, Maria Zambon, Alberto Zanella, Konrad Zawadka, Hiba Zayyad,  
497 Alexander Zoufaly, David Zucman; The PETAL Network Investigators, The Western Australian Covid-  
498 19 Research Response.  
499 (Author contributions are listed in the supplementary material.)

## 500 Funding

501 This work was supported by the Department for International Development and Wellcome Trust  
502 [215091/Z/18/Z]; the Bill and Melinda Gates Foundation [OPP1209135]. Country-specific support  
503 was provided by the Canadian Institutes of Health Research Coronavirus Rapid Research Funding  
504 Opportunity [OV2170359]; the Health Research Board Ireland [CTN Award 2014-012]; National  
505 Institute for Health Research (NIHR) [award CO-CIN-01]; the Medical Research Council (MRC) [grant  
506 MC\_PC\_19059]; the NIHR Health Protection Research Unit (HPRU) in Emerging and Zoonotic  
507 Infections at University of Liverpool in partnership with Public Health England (PHE), in collaboration  
508 with Liverpool School of Tropical Medicine and the University of Oxford [award 200907]; NIHR HPRU  
509 in Respiratory Infections at Imperial College London with PHE [award 200927]; Liverpool  
510 Experimental Cancer Medicine Centre [grant reference C18616/A25153]; NIHR Biomedical Research  
511 Centre at Imperial College London [IS-BRC-1215-20013]; EU Platform for European Preparedness  
512 Against (Re-)emerging Epidemics (PREPARE) [FP7 project 602525]; National Institutes of Health (NIH)  
513 [UL1TR002240]; and NIHR Clinical Research Network infrastructure support. We acknowledge the  
514 generous support of all ISARIC Partners who have contributed data and expertise to this analysis,  
515 with or without dedicated funding. The views expressed are those of the authors and not  
516 necessarily those of the funders or institutions listed above.

## 517 Conflicts of Interest

518 M. Cheng declares grants from McGill Interdisciplinary Initiative in Infection and Immunity, and  
519 Canadian Institutes of Health Research; and personal fees from GEn1E Lifesciences (as a member of

520 the scientific advisory board) and nplex biosciences (as a member of the scientific advisory board);  
521 M. Cummings and M. O'Donnell participated as investigators for completed and ongoing clinical  
522 trials evaluating the efficacy and safety of remdesivir (sponsored by Gilead Sciences) and  
523 convalescent plasma (sponsored by Amazon), in hospitalized patients with Covid-19 – support for  
524 this work is paid to Columbia University; J. C. Holter declared grants from Research Council of  
525 Norway [grant 312780], and Vivaldi Invest A/S owned by Jon Stephenson von Tetzchner, during the  
526 conduct of the study; A.Kimmoun declared personal fees (payment for lectures) from Baxter,  
527 Aguetant, Aspen; D. Kumar declared grants and personal fees from Roche, GSK and Merck, and  
528 personal fees from Pfizer and Sanofi; F.X. Lescure declared personal fees (payment for lectures) from  
529 Gilead, MSD; and travel/accommodation/meeting expenses from Astellas, Eumedica, MSD;bA.  
530 Pesenti declared personal fees from Maquet, Novalung/Xenios, Baxter, and Boehringer Ingelheim;  
531 R.Tedder reports grants from MRC/UKRI during the conduct of the study, and has a patent United  
532 Kingdom Patent Application No. 2014047.1 “SARS-CoV-2 antibody detection assay” issued; J. Troost  
533 declared personal fees from General Electric and Procter and Gamble.

## 534 Acknowledgements

535 We are extremely grateful to the frontline clinical and research staff and volunteers, who collected  
536 this data in challenging circumstances, and the generosity of the patients and their families for their  
537 individual contributions in these difficult times. This work uses data provided by patients and  
538 collected by the health institutions and authorities in each country. In the UK, this study involves the  
539 National Health Service as part of their care and support #DataSavesLives. We also acknowledge the  
540 support of Jeremy J Farrar, Nahoko Shindo, Devika Dixit, Nipunie Rajapakse, Andrew Davison, David  
541 Barr, Lyndsey Castle, Martha Buckley, Debbie Malden, Katherine Newell, Kwame O’Neill,  
542 Emmanuelle Denis, Claire Petersen, Scott Mullaney, Sue MacFarlane, Nicole Maziere, Julien  
543 Martinez, Oslem Dincarslan, Annette Lake and the Irish Critical Care Trials Group. We appreciate the  
544 strong collaboration of the WHO Clinical Data Platform Team, including Silvia Bertagnolio, Soe Soe

545 Thwin, and Janet Diaz.

## 546 References

- 547 1. Fraser C, Riley S, Anderson RM, Ferguson NM. Factors that make an infectious disease  
548 outbreak controllable. *Proc Natl Acad Sci U S A* **2004**; 101(16): 6146-51.
- 549 2. Clemency BM, Varughese R, Scheafer DK, et al. Symptom criteria for COVID-19 testing of  
550 health care workers. *Acad Emerg Med* **2020**; 27(6): 469-74.
- 551 3. Lu H, Stratton CW, Tang YW. Outbreak of pneumonia of unknown etiology in Wuhan, China:  
552 The mystery and the miracle. *J Med Virol* **2020**; 92(4): 401-2.
- 553 4. Huang C, Wang Y, Li X, et al. Clinical features of patients infected with 2019 novel  
554 coronavirus in Wuhan, China. *Lancet* **2020**; 395(10223): 497-506.
- 555 5. Wang G, Chen W, Jin X, Chen YP. Description of COVID-19 cases along with the measures  
556 taken on prevention and control in Zhejiang, China. *J Med Virol* **2020**.
- 557 6. Guan WJ, Ni ZY, Hu Y, et al. Clinical characteristics of coronavirus disease 2019 in China. *N*  
558 *Engl J Med* **2020**; 382(18): 1708-20.
- 559 7. Liang WH, Guan WJ, Li CC, et al. Clinical characteristics and outcomes of hospitalised  
560 patients with COVID-19 treated in Hubei (epicentre) and outside Hubei (non-epicentre): a  
561 nationwide analysis of China. *Eur Respir J* **2020**; 55(6): 2000562.
- 562 8. Docherty AB, Harrison EM, Green CA, et al. Features of 20 133 UK patients in hospital with  
563 covid-19 using the ISARIC WHO Clinical Characterisation Protocol: prospective observational  
564 cohort study. *BMJ* **2020**; 369: m1985.
- 565 9. Giacomelli A, Pezzati L, Conti F, et al. Self-reported olfactory and taste disorders in patients  
566 with severe acute respiratory coronavirus 2 infection: A cross-sectional study. *Clin Infect Dis*  
567 **2020**; 71(15): 889-90.
- 568 10. Yan CH, Faraji F, Prajapati DP, Boone CE, DeConde AS. Association of chemosensory  
569 dysfunction and COVID-19 in patients presenting with influenza-like symptoms. *Int Forum*  
570 *Allergy Rhinol* **2020**; 10(7): 806-13.
- 571 11. World Health Organization. Global surveillance for COVID-19 caused by human infection  
572 with COVID-19 virus: Interim guidance. Geneva, Switzerland: World Health Organization,  
573 **2020**.
- 574 12. Centers for Disease Control and Prevention. Symptoms of coronavirus. Available at:  
575 <https://www.cdc.gov/coronavirus/2019-ncov/symptoms-testing/symptoms.html>. Accessed  
576 20 May 2020.
- 577 13. Public Health England. COVID-19: investigation and initial clinical management of possible  
578 cases. Available at: [https://www.gov.uk/government/publications/wuhan-novel-](https://www.gov.uk/government/publications/wuhan-novel-coronavirus-initial-investigation-of-possible-cases/investigation-and-initial-clinical-management-of-possible-cases-of-wuhan-novel-coronavirus-wn-cov-infection)  
579 [coronavirus-initial-investigation-of-possible-cases/investigation-and-initial-clinical-](https://www.gov.uk/government/publications/wuhan-novel-coronavirus-initial-investigation-of-possible-cases/investigation-and-initial-clinical-management-of-possible-cases-of-wuhan-novel-coronavirus-wn-cov-infection)  
580 [management-of-possible-cases-of-wuhan-novel-coronavirus-wn-cov-infection](https://www.gov.uk/government/publications/wuhan-novel-coronavirus-initial-investigation-of-possible-cases/investigation-and-initial-clinical-management-of-possible-cases-of-wuhan-novel-coronavirus-wn-cov-infection). Accessed 20  
581 May 2020.
- 582 14. Manoharan L, Cattrall JWS, Harris C, et al. Early clinical characteristics of Covid-19: scoping  
583 review. *MedRxiv* **2020**: 2020.07.31.20165738. [Preprint]. August 4, 2020 [cited 7 August  
584 2020]. Available from <https://doi.org/10.1101/2020.07.31.20165738>.
- 585 15. International Severe Acute Respiratory and Emerging Infection Consortium, World Health  
586 Organization. ISARIC/WHO Clinical Characterisation Protocol for Severe Emerging Infections,  
587 version 3.2: ISARIC, **2020**.
- 588 16. International Severe Acute Respiratory and Emerging Infection Consortium. COVID-19 CRF.  
589 Available at: <https://isaric.tghn.org/COVID-19-CRF/>. Accessed 21 August 2020.
- 590 17. Yang X, Yu Y, Xu J, et al. Clinical course and outcomes of critically ill patients with SARS-CoV-2  
591 pneumonia in Wuhan, China: a single-centered, retrospective, observational study. *Lancet*  
592 *Respir Med* **2020**; 8(5): 475-81.

- 593 18. Zhou F, Yu T, Du R, et al. Clinical course and risk factors for mortality of adult inpatients with  
594 COVID-19 in Wuhan, China: a retrospective cohort study. *Lancet* **2020**; 395(10229): 1054-62.
- 595 19. Dunning JW, Merson L, Rohde GGU, et al. Open source clinical science for emerging  
596 infections. *Lancet Infect Dis* **2014**; 14(1): 8-9.
- 597 20. ISARIC clinical characterisation group. Global outbreak research: harmony not hegemony.  
598 *Lancet Infect Dis* **2020**; 20(7): 770-2.
- 599 21. Hall M, Pritchard M, Dankwa E, et al. ISARIC COVID-19 clinical data report: 8 June 2020.  
600 *MedRxiv* **2020**: 2020.07.17.20155218 [Preprint]. July 25, 2020 [cited 7 August 2020].  
601 Available from <https://doi.org/10.1101/2020.07.17.20155218>.
- 602 22. ISARIC 4C. ISARIC 4C protocols. Available at: <https://isaric4c.net/protocols/>. Accessed 26  
603 August 2020.
- 604 23. COVID-19 Critical Care Consortium. COVID-19 Critical Care Consortium Trial Documents.  
605 Available at: <https://www.else.org/COVID19/ECMOCARD.aspx>. Accessed 26 August 2020.
- 606 24. Munblit D, Nekliudov NA, Bugaeva P, et al. StopCOVID cohort: An observational study of  
607 3,480 patients admitted to the Sechenov University hospital network in Moscow city for  
608 suspected COVID-19 infection. *Clin Infect Dis* **2020**.
- 609 25. Larsen K, Merlo J. Appropriate assessment of neighborhood effects on individual health:  
610 integrating random and fixed effects in multilevel logistic regression. *Am J Epidemiol* **2005**;  
611 161(1): 81-8.
- 612 26. Lauretani F, Ravazzoni G, Roberti MF, et al. Assessment and treatment of older individuals  
613 with COVID 19 multi-system disease: Clinical and ethical implications. *Acta Biomed* **2020**;  
614 91(2): 150-68.
- 615 27. Liu K, Chen Y, Lin R, Han K. Clinical features of COVID-19 in elderly patients: A comparison  
616 with young and middle-aged patients. *J Infect* **2020**; 80(6): e14-e8.
- 617 28. Jung YJ, Yoon JL, Kim HS, Lee AY, Kim MY, Cho JJ. Atypical clinical presentation of geriatric  
618 syndrome in elderly patients with pneumonia or coronary artery disease. *Ann Geriatr Med  
619 Res* **2018**; 21(4): 158-63.
- 620 29. Wester AL, Dunlop O, Melby KK, Dahle UR, Wyller TB. Age-related differences in symptoms,  
621 diagnosis and prognosis of bacteremia. *BMC Infect Dis* **2013**; 13: 346.
- 622 30. Lu X, Zhang L, Du H, et al. SARS-CoV-2 Infection in Children. *N Engl J Med* **2020**; 382(17):  
623 1663-5.
- 624 31. Ludvigsson JF. Systematic review of COVID-19 in children shows milder cases and a better  
625 prognosis than adults. *Acta Paediatr* **2020**; 109: 1088-95.
- 626 32. Swann OV, Holden KA, Turtle L, et al. Clinical characteristics of children and young people  
627 admitted to hospital with covid-19 in United Kingdom: prospective multicentre  
628 observational cohort study. *BMJ* **2020**; 370: m3249.
- 629 33. Millar JE, Neyton L, Seth S, et al. Robust, reproducible clinical patterns in hospitalised  
630 patients with COVID-19. *MedRxiv* **2020**: 2020.08.14.20168088. [Preprint]. August 16, 2020  
631 [cited 2 September 2020]. Available from: <https://doi.org/10.1101/2020.08.14.20168088>
- 632 34. Sierpiński R, Pinkas J, Jankowski M, et al. Sex differences in the frequency of gastrointestinal  
633 symptoms and olfactory or taste disorders in 1942 nonhospitalized patients with coronavirus  
634 disease 2019 (COVID-19). *Pol Arch Intern Med* **2020**; 130(6): 501-5.
- 635 35. World Bank. World Bank country and lending groups. Available at:  
636 [https://datahelpdesk.worldbank.org/knowledgebase/articles/906519-world-bank-country-  
637 and-lending-groups](https://datahelpdesk.worldbank.org/knowledgebase/articles/906519-world-bank-country-and-lending-groups).

638

639



640 Tables

641 **Table 1. Patient demographics**

| Variable*                      | Overall<br>n = 60 161 | Sex                  |                    | P-value |
|--------------------------------|-----------------------|----------------------|--------------------|---------|
|                                |                       | Female<br>n = 25 487 | Male<br>n = 34 674 |         |
| Age (years) :median [IQR]      | 70 [54, 82]           | 72 [55, 83]          | 68 [54, 80]        | <0.001  |
| Age bands (years)              |                       |                      |                    | <0.001  |
| 0–10                           | 514 (0.9)             | 221 (0.9)            | 293 (0.8)          |         |
| 10–20                          | 523 (0.9)             | 221 (0.9)            | 302 (0.9)          |         |
| 20–30                          | 1973 (3.3)            | 873 (3.4)            | 1100 (3.2)         |         |
| 30–40                          | 3211 (5.3)            | 1452 (5.7)           | 1759 (5.1)         |         |
| 40–50                          | 5018 (8.3)            | 1967 (7.7)           | 3051 (8.8)         |         |
| 50–60                          | 8584 (14.3)           | 3280 (12.9)          | 5304 (15.3)        |         |
| 60–70                          | 9882 (16.4)           | 3702 (14.5)          | 6180 (17.8)        |         |
| 70–80                          | 12351 (20.5)          | 4924 (19.3)          | 7427 (21.4)        |         |
| 80–90                          | 13495 (22.4)          | 6202 (24.3)          | 7293 (21.0)        |         |
| >=90                           | 4610 (7.7)            | 2645 (10.4)          | 1965 (5.7)         |         |
| Region†                        |                       |                      |                    | <0.001  |
| East Asia & Pacific            | 3252 (5.4)            | 1117 (4.4)           | 2135 (6.2)         |         |
| Europe & Central Asia          | 55453 (92.2)          | 23768 (93.3)         | 31685 (91.4)       |         |
| Latin America & Caribbean      | 162 (0.3)             | 67 (0.3)             | 95 (0.3)           |         |
| Middle East & North Africa     | 91 (0.2)              | 35 (0.1)             | 56 (0.2)           |         |
| North America                  | 926 (1.5)             | 413 (1.6)            | 513 (1.5)          |         |
| South Asia                     | 267 (0.4)             | 83 (0.3)             | 184 (0.5)          |         |
| Sub-Saharan Africa             | 10 (0.0)              | 4 (0.0)              | 6 (0.0)            |         |
| Country income classification† |                       |                      |                    | <0.001  |
| High income                    | 54888 (91.2)          | 23439 (92.0)         | 31449 (90.7)       |         |
| Upper middle income            | 5003 (8.3)            | 1964 (7.7)           | 3039 (8.8)         |         |
| Lower middle or low income     | 270 (0.4)             | 84 (0.3)             | 186 (0.5)          |         |

IQR, interquartile range

\* Data are number (percent within columns) unless specified otherwise  
† According to World Bank classification [35]

642

643

644 **Table 2. Symptoms at presentation to hospital with Covid-19**

| Variable*                                                                      | Overall<br>n = 60 161 | Sex                  |                    | P-<br>value | Missing<br>data† |
|--------------------------------------------------------------------------------|-----------------------|----------------------|--------------------|-------------|------------------|
|                                                                                |                       | Female<br>n = 25 487 | Male<br>n = 34 674 |             |                  |
| Fever                                                                          | 41109 (68.4)          | 16663 (65.4)         | 24446 (70.5)       | <0.001      | 34 (0.1)         |
| Cough                                                                          | 40930 (68.1)          | 16696 (65.6)         | 24234 (69.9)       | <0.001      | 50 (0.1)         |
| Shortness of breath                                                            | 37577 (62.5)          | 15450 (60.7)         | 22127 (63.9)       | <0.001      | 78 (0.1)         |
| Fatigue                                                                        | 23319 (38.8)          | 9889 (38.9)          | 13430 (38.8)       | 0.903       | 120 (0.2)        |
| Confusion                                                                      | 13732 (24.1)          | 6108 (25.1)          | 7624 (23.4)        | <0.001      | 3196 (5.3)       |
| Diarrhoea                                                                      | 10061 (16.8)          | 4565 (17.9)          | 5496 (15.9)        | <0.001      | 114 (0.2)        |
| Nausea and vomiting                                                            | 9891 (16.5)           | 5099 (20.0)          | 4792 (13.8)        | <0.001      | 110 (0.2)        |
| Muscle pains                                                                   | 9472 (15.8)           | 3952 (15.5)          | 5520 (16.0)        | 0.167       | 124 (0.2)        |
| Anorexia                                                                       | 613 (13.3)            | 243 (12.2)           | 370 (14.1)         | 0.065       | 55552 (92.3)     |
| Chest pain                                                                     | 6953 (11.6)           | 3084 (12.1)          | 3869 (11.2)        | <0.001      | 118 (0.2)        |
| Headache                                                                       | 6154 (10.3)           | 2830 (11.1)          | 3324 (9.6)         | <0.001      | 136 (0.2)        |
| Abdominal pain                                                                 | 5305 (8.8)            | 2597 (10.2)          | 2708 (7.8)         | <0.001      | 123 (0.2)        |
| Sore throat                                                                    | 4880 (8.1)            | 2135 (8.4)           | 2745 (8.0)         | 0.046       | 243 (0.4)        |
| Severe dehydration                                                             | 3451 (7.2)            | 1562 (7.6)           | 1889 (6.9)         | 0.005       | 12166 (20.2)     |
| Wheeze                                                                         | 3845 (6.4)            | 1790 (7.0)           | 2055 (6.0)         | <0.001      | 246 (0.4)        |
| Joint pains                                                                    | 3229 (5.4)            | 1459 (5.7)           | 1770 (5.1)         | 0.001       | 141 (0.2)        |
| Altered sense of taste                                                         | 2011 (5.2)            | 924 (5.5)            | 1087 (5.0)         | 0.014       | 21598 (35.9)     |
| Altered sense of smell                                                         | 1733 (4.5)            | 819 (4.9)            | 914 (4.2)          | 0.001       | 21483 (35.7)     |
| Unable to walk                                                                 | 220 (4.4)             | 83 (3.8)             | 137 (4.7)          | 0.145       | 55106 (91.6)     |
| Rhinorrhoea                                                                    | 2382 (4.0)            | 1041 (4.1)           | 1341 (3.9)         | 0.193       | 244 (0.4)        |
| Skin ulcer                                                                     | 978 (1.9)             | 489 (2.2)            | 489 (1.6)          | <0.001      | 7924 (13.2)      |
| Haemorrhage                                                                    | 993 (1.7)             | 429 (1.7)            | 564 (1.6)          | 0.625       | 249 (0.4)        |
| Seizure                                                                        | 775 (1.4)             | 352 (1.4)            | 423 (1.3)          | 0.147       | 3221 (5.4)       |
| Lower chest wall indrawing                                                     | 688 (1.2)             | 235 (1.0)            | 453 (1.4)          | <0.001      | 3349 (5.6)       |
| Rash                                                                           | 694 (1.2)             | 287 (1.1)            | 407 (1.2)          | 0.612       | 130 (0.2)        |
| Lymphadenopathy                                                                | 307 (0.5)             | 147 (0.6)            | 160 (0.5)          | 0.081       | 3340 (5.6)       |
| Conjunctivitis                                                                 | 251 (0.4)             | 111 (0.4)            | 140 (0.4)          | 0.599       | 252 (0.4)        |
| Ear pain                                                                       | 201 (0.4)             | 107 (0.5)            | 94 (0.3)           | 0.002       | 5275 (8.8)       |
| <i>Composite categories</i>                                                    |                       |                      |                    |             | 314 (0.5)‡       |
| Fever plus one of cough or shortness of breath                                 | 35394 (59.1)          | 14174 (55.9)         | 21220 (61.5)       | <0.001      |                  |
| Fever plus one of cough, rhinorrhoea, shortness of breath, sore throat, wheeze | 36006 (60.2)          | 14466 (57.0)         | 21540 (62.5)       | <0.001      |                  |
| Cough or fever                                                                 | 50985 (85.2)          | 21033 (82.9)         | 29952 (86.9)       | <0.001      |                  |
| One or more of cough, shortness of breath, fever, muscle pain, sore throat     | 55198 (92.2)          | 22982 (90.6)         | 32216 (93.4)       | <0.001      |                  |

\* Data are number (percent of patients with non-missing data within columns) unless specified otherwise

†Number (percent of all patients)

‡Patients missing any symptom included in these criteria are omitted from the composite categories

646 **Table 3. Symptoms reported for patients meeting none of the clinical case definitions**

| Symptom*                  | Overall<br>n = 4649 | Age group (years) |               |                |                |                |                |                |                |                 |                | Missing<br>data |
|---------------------------|---------------------|-------------------|---------------|----------------|----------------|----------------|----------------|----------------|----------------|-----------------|----------------|-----------------|
|                           |                     | 0–<br>n = 41      | 10–<br>n = 74 | 20–<br>n = 178 | 30–<br>n = 188 | 40–<br>n = 183 | 50–<br>n = 309 | 60–<br>n = 494 | 70–<br>n = 981 | 80–<br>n = 1542 | 90–<br>n = 659 |                 |
| Confusion                 | 2158 (48.8)         | 5 (12.5)          | 3 (8.3)       | 7 (7.3)        | 11 (7.9)       | 26 (16.0)      | 62 (21.6)      | 178 (37.0)     | 528 (54.2)     | 897 (58.2)      | 441 (66.9)     | 230 (4.9)       |
| Fatigue                   | 1186 (25.5)         | 10 (24.4)         | 6 (8.1)       | 18 (10.1)      | 24 (12.8)      | 29 (15.8)      | 79 (25.6)      | 137 (27.7)     | 276 (28.1)     | 452 (29.3)      | 155 (23.5)     | 0 (0.0)         |
| Nausea and vomiting       | 1040 (22.4)         | 17 (41.5)         | 22 (29.7)     | 42 (23.6)      | 64 (34.0)      | 76 (41.5)      | 99 (32.0)      | 131 (26.5)     | 216 (22.0)     | 270 (17.5)      | 103 (15.6)     | 0 (0.0)         |
| Abdominal pain            | 844 (18.2)          | 6 (14.6)          | 21 (28.4)     | 49 (27.5)      | 71 (37.8)      | 54 (29.5)      | 87 (28.2)      | 117 (23.7)     | 173 (17.6)     | 195 (12.6)      | 71 (10.8)      | 1 (0.0)         |
| Diarrhoea                 | 631 (13.6)          | 7 (17.1)          | 6 (8.1)       | 22 (12.4)      | 21 (11.2)      | 29 (15.8)      | 49 (15.9)      | 97 (19.6)      | 148 (15.1)     | 187 (12.1)      | 65 (9.9)       | 1 (0.0)         |
| Severe dehydration        | 521 (12.7)          | 3 (9.1)           | 2 (5.9)       | 3 (4.1)        | 2 (1.8)        | 9 (6.8)        | 19 (7.6)       | 43 (9.9)       | 121 (13.2)     | 225 (15.2)      | 94 (14.7)      | 541 (11.6)      |
| Headache                  | 300 (6.5)           | 1 (2.4)           | 6 (8.1)       | 32 (18.0)      | 27 (14.4)      | 32 (17.5)      | 24 (7.8)       | 45 (9.1)       | 53 (5.4)       | 54 (3.5)        | 26 (4.0)       | 2 (0.0)         |
| Chest pain                | 295 (6.3)           | 0 (0.0)           | 0 (0.0)       | 8 (4.5)        | 11 (5.9)       | 19 (10.4)      | 49 (15.9)      | 49 (9.9)       | 46 (4.7)       | 83 (5.4)        | 30 (4.6)       | 0 (0.0)         |
| Haemorrhage               | 259 (5.6)           | 0 (0.0)           | 1 (1.4)       | 6 (3.4)        | 11 (5.9)       | 14 (7.7)       | 15 (4.9)       | 25 (5.1)       | 48 (4.9)       | 95 (6.2)        | 44 (6.7)       | 1 (0.0)         |
| Joint pain                | 197 (4.2)           | 1 (2.4)           | 3 (4.1)       | 2 (1.1)        | 5 (2.7)        | 7 (3.8)        | 7 (2.3)        | 16 (3.2)       | 33 (3.4)       | 86 (5.6)        | 37 (5.6)       | 1 (0.0)         |
| Seizure                   | 181 (4.1)           | 5 (12.5)          | 3 (8.3)       | 6 (6.2)        | 7 (5.0)        | 13 (8.0)       | 17 (5.9)       | 27 (5.6)       | 35 (3.6)       | 52 (3.4)        | 16 (2.4)       | 230 (4.9)       |
| Skin ulcer                | 169 (4.0)           | 1 (3.0)           | 0 (0.0)       | 0 (0.0)        | 0 (0.0)        | 3 (2.0)        | 10 (3.6)       | 12 (2.6)       | 49 (5.2)       | 57 (3.8)        | 37 (5.7)       | 379 (8.2)       |
| Altered sense of<br>smell | 118 (3.3)           | 0 (0.0)           | 14 (19.4)     | 40 (25.8)      | 24 (15.2)      | 13 (8.8)       | 8 (3.4)        | 10 (2.6)       | 2 (0.3)        | 7 (0.6)         | 0 (0.0)        | 1029 (22.1)     |
| Rhinorrhoea               | 137 (2.9)           | 2 (4.9)           | 21 (28.4)     | 44 (24.7)      | 27 (14.4)      | 18 (9.8)       | 11 (3.6)       | 8 (1.6)        | 1 (0.1)        | 2 (0.1)         | 3 (0.5)        | 0 (0.0)         |
| Altered sense of<br>taste | 74 (2.0)            | 1 (2.9)           | 4 (5.6)       | 23 (14.8)      | 9 (5.7)        | 7 (4.8)        | 1 (0.4)        | 7 (1.8)        | 8 (1.1)        | 11 (0.9)        | 3 (0.6)        | 1029 (22.1)     |
| Rash                      | 80 (1.7)            | 6 (14.6)          | 3 (4.1)       | 2 (1.1)        | 2 (1.1)        | 5 (2.7)        | 6 (1.9)        | 13 (2.6)       | 18 (1.8)       | 17 (1.1)        | 8 (1.2)        | 2 (0.0)         |
| Wheeze                    | 62 (1.3)            | 0 (0.0)           | 0 (0.0)       | 1 (0.6)        | 0 (0.0)        | 0 (0.0)        | 3 (1.0)        | 7 (1.4)        | 13 (1.3)       | 26 (1.7)        | 12 (1.8)       | 0 (0.0)         |

\* Data are number (percent of patients with non-missing data within columns). Symptoms experienced by <25 individuals are omitted.

647

648

649

## 650 Figure legends

### 651 **Figure 1. Flow of participants in this analysis.**

652 4C, Coronavirus Clinical Characterisation Consortium; CCC, Critical Care Consortium; ISARIC,  
653 International Severe Acute Respiratory and emerging Infection Consortium; REDCap, Research  
654 Electronic Data Capture; SARS-CoV-2, severe acute respiratory syndrome coronavirus-2.

655

656

### 657 **Figure 2. Age-specific prevalence of symptoms at hospital admission.**

658

659

### 660 **Figure 3. Proportions meeting clinical criteria at hospital admission stratified by 10-year age band.**

661 Black boxes show the proportion of individuals, with error bars showing 95% confidence intervals  
662 calculated using the Clopper–Pearson method. The size of each box is inversely proportional to the  
663 variance, so larger boxes indicate greater certainty. Grey boxes with 95% confidence intervals show  
664 the proportions in the sensitivity analysis excluding patients recruited in the United Kingdom.  
665 ‘Respiratory symptom’ is any of cough, rhinorrhoea, shortness of breath, sore throat or wheeze.  
666 Patients missing a symptom included in any criteria are excluded from all four plots.

667

668

### 669 **Figure 4. Odds of symptoms among patients admitted to hospital with Covid-19, stratified by age 670 and sex.**

671 Each plot is the result of a logistic regression with a symptom as an outcome. Fixed effects of age in  
672 ten-year bands (baseline group 50–60 years) and sex are shown in black boxes with 95% confidence  
673 intervals. The size of each square is inversely proportional to the variance of the log odds ratio, so  
674 larger boxes indicate greater certainty. Clustering by country is included as a random intercept and

675 heterogeneity is depicted by circles showing the median odds ratio.

676

677

678 **Figure 5. Age- and sex- specific odds of meeting clinical definitions among patients admitted to**  
679 **hospital with Covid-19, stratified by age and sex.**

680 Each plot is the result of a logistic regression with a composite group of symptoms as an outcome.

681 Fixed effects of age in ten-year bands (baseline group 50–60 years) and sex are shown in black boxes

682 with 95% confidence intervals. The size of each square is inversely proportional to the variance of

683 the log odds ratio, so larger boxes indicate greater certainty. Clustering by country is included as a

684 random intercept and heterogeneity is depicted by circles showing the median odds ratio.

685 ‘Respiratory symptom’ is any of cough, rhinorrhoea, shortness of breath, sore throat or wheeze.

686 Patients missing a symptom included in any criteria are excluded from all four plots.

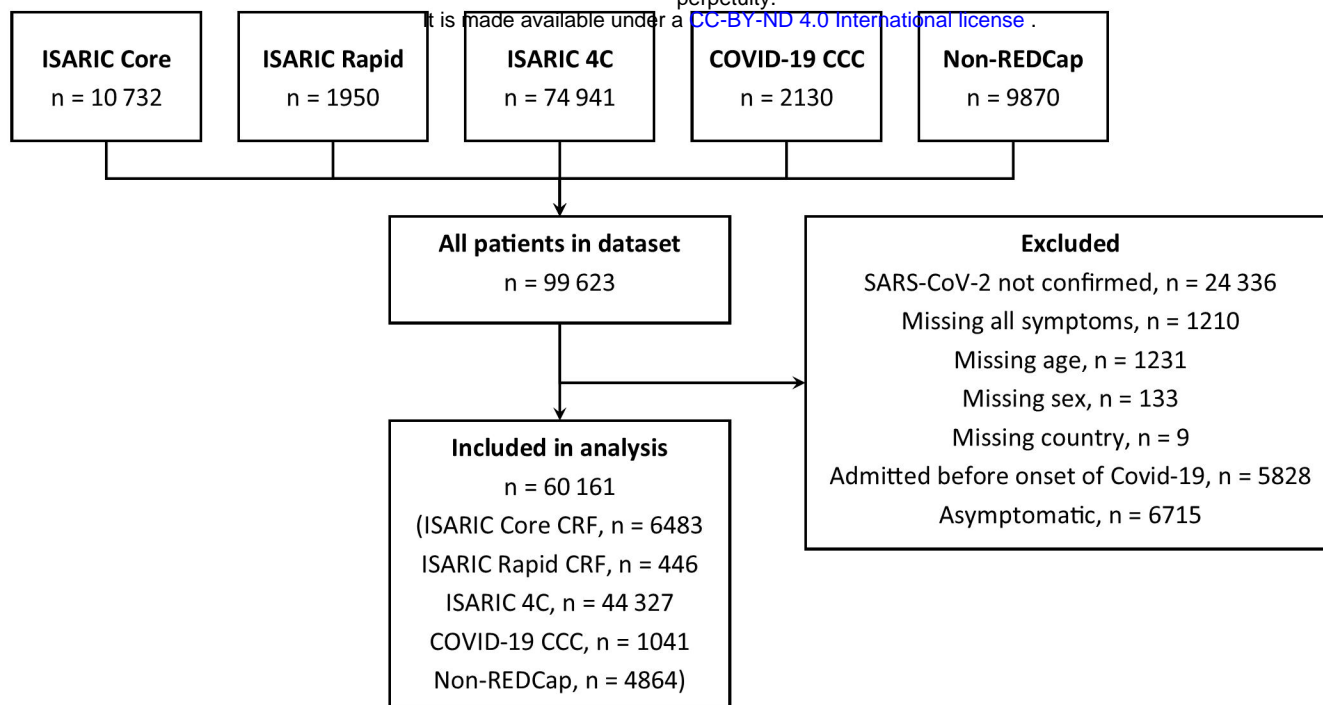

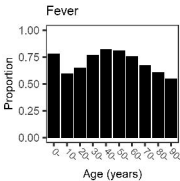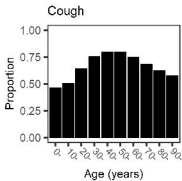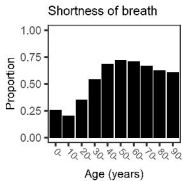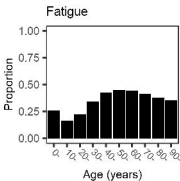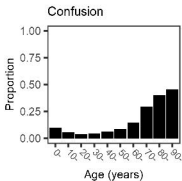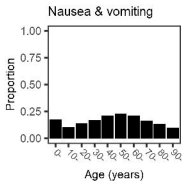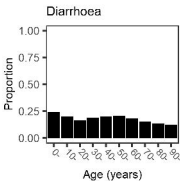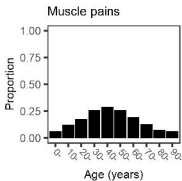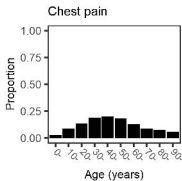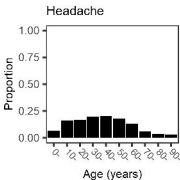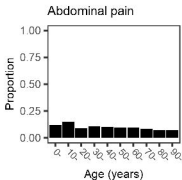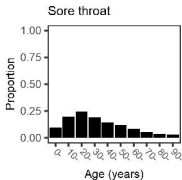

Fever plus cough or shortness of breath

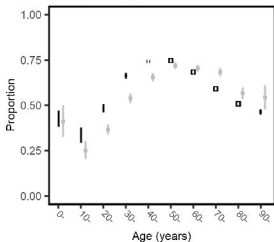

Fever plus respiratory symptom

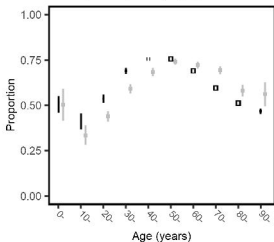

Cough or fever

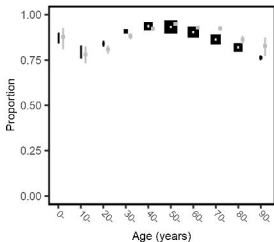

Cough, short of breath, fever, muscle pain, or sore throat

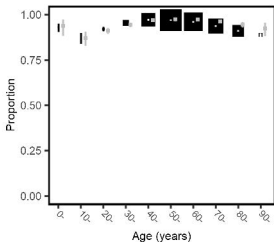



Fever

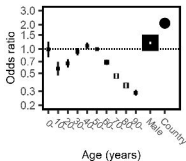

Cough

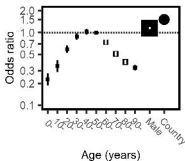

Shortness of breath

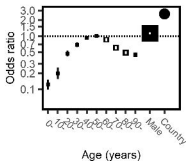

Fatigue

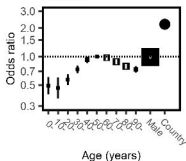

Confusion

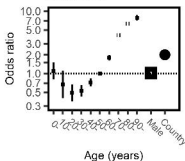

Nausea &amp; vomiting

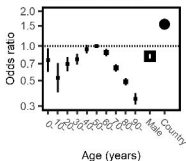

Diarrhoea

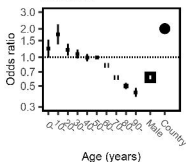

Muscle pains

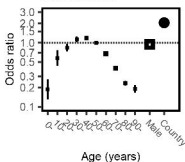

Chest pain

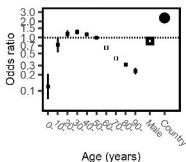

Headache

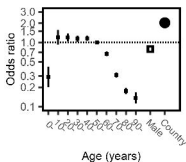

Abdominal pain

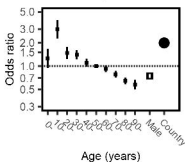

Sore throat

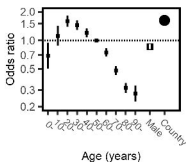

Fever plus cough or shortness of breath

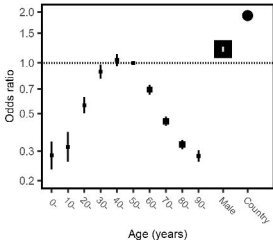

Fever plus respiratory symptom

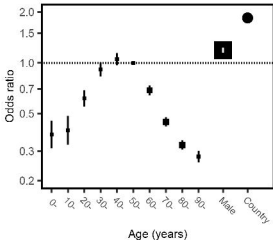

Cough or fever

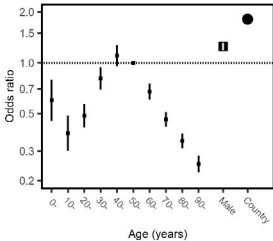

Cough, shortness of breath, fever, muscle pain, or sore throat

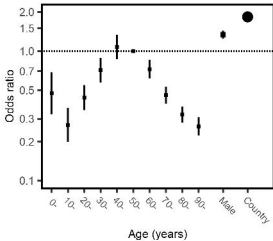

Source: https://medrxiv.org/content/10.1101/2020.10.26.20219519v1.full.pdf
