Symptoms at presentation for patients admitted to hospital with  
Covid-19: results from the ISARIC prospective multinational  
observational study

## Authors

ISARIC Clinical Characterisation Group \*

\* Members listed at end of manuscript

## Keywords

Covid-19, SARS-CoV-2, symptoms, diagnosis, case definition

## Running title

Covid-19 symptoms at hospital admission

## Correspondence to

Dr Mark G Pritchard

Centre for Tropical Medicine and Global Health, Nuffield Department of Medicine, University of

Oxford, Oxford, UK

mark.pritchard@ndm.ox.ac.uk

## Alternate corresponding author

Professor Piero L Olliaro

Centre for Tropical Medicine and Global Health, Nuffield Department of Medicine, University of

NOTE: This preprint reports new research that has not been certified by peer review and should not be used to guide clinical practice.

25 Oxford, Oxford, UK

26 piero.olliaro@ndm.ox.ac.uk

27

## 28 **Summary**

29 Typical symptoms of fever, cough and shortness of breath are less common in people admitted to  
30 hospital with Covid-19 toward extremities of age. Published case definitions appear less sensitive  
31 toward extremes of age, and atypical symptoms need to be recognised.

32

33

## Abstract

### Background

Symptom recognition is necessary to identify people with possible Covid-19. Clinical case definitions vary in type and number of symptoms included. No large studies have investigated how these perform for hospitalized patients of different ages and sex.

### Methods

We used international prospective observational data from patients admitted to hospital with laboratory-confirmed Covid-19. We investigated how symptoms varied by age and sex. We performed logistic regression to assess the relationship of age and sex with the most prevalent symptoms in our dataset and with published case definitions, allowing for clustering by country as a random intercept.

### Results

60 161 patients from 43 countries were included, with median age 70 years (interquartile range 55–82). Fever (68%), cough (68%) and shortness of breath (63%) were the most prevalent symptoms. Their prevalence was greater among patients aged 30–60 years (respectively 79%, 78%, 66%), and lower in children ( $\leq 18$  years: 68%, 47%, 22%) and older adults ( $\geq 70$  years: 61%, 62%, 61%). The most sensitive case definition assessed was one or more of cough, shortness of breath, fever, muscle pains or sore throat, met by 92% of the whole cohort. Confusion was the most prevalent symptom for patients whose symptoms did not meet any of the assessed case definitions. Regression models showed significant differences in symptoms with age, and considerable heterogeneity between countries.

### Conclusions

Older adults and children admitted to hospital with Covid-19 are less likely to present with typical symptoms of cough, fever and shortness of breath. Vigilance for atypical symptoms towards extremities of age increases sensitivity of identifying Covid-19.

## Background

For emerging infectious diseases, knowledge of symptoms is vital to identify people with possible infection and follow-up actions [1]. Details of exposures, symptoms, signs and investigations are combined into case definitions to classify suspected, probable and confirmed cases. These can be used for disease surveillance, to guide public health actions, and case management. In settings without microbiological testing, these criteria may be used to reach a clinical diagnosis; in settings where testing is available they may be used to guide testing strategies [2].

Covid-19 emerged in December 2019, caused by the severe acute respiratory syndrome coronavirus-2 (SARS-CoV-2) [3, 4]. The most frequently reported symptoms were fever, cough and shortness of breath, together with a range of less frequent symptoms [4-8]. Altered sense of taste and smell have been found to be strongly associated with Covid-19 [2, 9, 10]. The World Health Organization (WHO) surveillance case definition (used by the European and African Centres for Disease Control) for people who have been in a location with community transmission of Covid-19 requires fever and at least one sign or symptom of respiratory disease, such as cough or shortness of breath [11]. The Centers for Disease Control and Prevention in the United States provides a non-exhaustive list of respiratory, enteric and constitutional symptoms: fever or chills, cough, shortness of breath or difficulty breathing, fatigue, muscle or body aches, headache, new loss of taste or smell, sore throat, congestion or runny nose, nausea or vomiting, and diarrhoea [12]. Public Health England's definition of a possible Covid-19 case in the community is any one of new continuous cough, high temperature, or change to sense of taste or smell [13]. For inpatients, their definition is evidence of pneumonia, acute respiratory distress syndrome, or one of two clusters of symptoms: fever with at least one of cough, hoarseness, nasal discharge or congestion, shortness of breath, sore throat, wheezing or sneezing; or any change in sense of taste or smell [13].

Despite Covid-19's status as a pandemic, large reports of clinical characteristics have so far been limited to cohorts from China, Europe and the United States [14]. There have also been no reports of differences in symptoms according to age or sex from large cohorts. Our primary

objective was to investigate how symptoms of patients admitted to hospital with confirmed Covid-19 vary by age and sex. Secondly we aimed to investigate how sensitivity of clinical case definitions varied among these populations, and to explore heterogeneity between countries.

## Methods

### Study design and setting

This analysis used international observational data of clinical features of patients admitted to hospital with Covid-19 between 30 January and 3 August 2020. The International Severe Acute Respiratory and emerging Infection Consortium (ISARIC)/WHO Clinical Characterisation Protocol for Severe Emerging Infections is a standardized protocol for investigation of severe acute infections by pathogens of public health interest [15]. The ISARIC case report forms [16] allow standardized data collection from the start of an outbreak and rapid dissemination of clinical information [4, 17-21]. Different tiers of data collection exist to allow sites to collect data to the highest possible standards while recognising varying levels of resource for data collection during epidemics. Details of symptoms at admission were included on the case report forms for all tiers. Data were collected via electronic 'Core' and 'Rapid' forms by the ISARIC Clinical Characterisation Group, and through aligned forms by ISARIC-4C Coronavirus Clinical Characterisation Consortium in the United Kingdom [22] and the COVID-19 Critical Care Consortium [23]. Investigators from 41 countries are using Research electronic Data Capture (REDCap, version 8.11.11, Vanderbilt University, Nashville, Tenn.) to contribute their data to a central database hosted by the University of Oxford. Additional data were submitted by investigators from Malaysia, Russia [24] and Spain, who were not using the University of Oxford REDCap instance. All investigators retained full rights to their data.

### Study population

Patients of any age admitted to hospital with suspected or confirmed Covid-19 were eligible for recruitment. Some versions of the case report form included specific criteria such as fever and cough, but investigators were able to include patients with a clinical suspicion of Covid-19 even if

these criteria were not met. This analysis was limited to patients who were admitted to hospital with symptomatic laboratory-confirmed Covid-19, according to sites' local diagnostic methods. We excluded asymptomatic patients who had been admitted to hospital for isolation and patients admitted for other conditions who subsequently developed Covid-19 symptoms.

## Variables and measurement

Variables used in this analysis were age, sex at birth, symptoms, date of symptoms onset, SARS-CoV-2 confirmation, and country of recruitment. To allow proportions to be calculated with a reliable denominator, only symptoms prespecified on the case report forms [16, 22, 23] were included in this analysis. The list of symptoms collected is presented with the results.

## Ethical considerations

This observational study required no change to clinical management and permitted enrolment in other research. The study was approved by the World Health Organization Ethics Review Committee (RPC571 and RPC572). Local ethics approval was obtained for each participating country and site according to local requirements.

## Statistical methods

Data were converted to Study Data Tabulation Model (version 1.7, Clinical Data Interchange Standards Consortium, Austin, Tex.) to allow inclusion of data submitted not using the ISARIC case report forms. We excluded patients with all symptoms recorded as missing or unknown, and those with missing age, sex, country or onset date.

Continuous variables were expressed as median with interquartile range, and categorical variables as counts with percentages. We tested for differences between female and male patients using Wilcoxon rank-sum tests for continuous variables and chi-square tests for categorical variables. We grouped patients into ten-year age bands (with a single group for age  $\geq 90$  years). We plotted the most frequently reported symptoms by age group, presenting missing data as a third category.

We collated symptoms according to four sets of clinical criteria, based on published case definitions [11-13]:

1. Fever plus at least one of cough or shortness of breath;
2. Fever plus at least one of cough, nasal discharge, shortness of breath, sore throat, or wheeze;
3. Either cough or fever;
4. One or more of cough, shortness of breath, fever, muscle pains, or sore throat.

(Altered senses of smell and taste were not included in these classifications as they were not included on all versions of the case report forms so had high levels of missingness.) Patients with missing details of any symptoms included in these criteria were omitted from the composite groups. We plotted proportions of patients meeting each set of criteria by ten-year age group, with 95% confidence intervals (CI) calculated using the Clopper–Pearson method.

We used logistic regression to identify associations of age and sex with the twelve most prevalent symptoms. Age group and sex were included as fixed effects, with country as a random intercept. To display heterogeneity between countries on the same scale as the fixed effects, we calculated median odds ratios (MOR) [25]. This quantifies variation between countries by comparing odds of an outcome between randomly chosen persons in different clusters who share the same covariates [25]. MORs are defined as a comparison of the group with greater propensity to the group with lower propensity, so lie in the range 1 to infinity [25]. We plotted the MOR to show the magnitude of the effect of heterogeneity and allow comparison with the fixed effects in our data.

79% of patients were recruited in a single country. As a sensitivity analysis, we repeated the analysis excluding patients from this country to see if results substantially changed. Finally, we plotted age-stratified symptom frequencies for each country with at least 250 patients.

No minimum sample size was calculated. All significance tests were two-tailed. Analyses were performed using R (version 3.6.2, R Foundation for Statistical Computing, Vienna, Austria) with packages including *binom*, *Epi*, *ggplot2*, *lme4*, *sjstats*, *tableone*, and *tidyverse*.

## Results

Data were available for 99 623 patients. We excluded 24 336 who did not have documented SARS-CoV-2 confirmation, 2583 with missing data, and 5828 who developed Covid-19 after admission to hospital. 6715 (9.6%) were admitted to hospital with a diagnosis of asymptomatic Covid-19. The greatest proportion of asymptomatic patients was in the age-band 10–20 years (46%, Supplementary Figure 1). The greatest proportion of asymptomatic patients was in Malaysia (49%), where hospitalization was compulsory throughout the data collection period for people with Covid-19. After excluding asymptomatic patients, 60 161 patients remained in the dataset (Figure 1). Included patients were recruited from 394 sites in 43 countries (Supplementary Table 1). 47 332 (79%) patients were included from the United Kingdom.

The median age of included patients was 70 years (interquartile range [IQR] 54–82; Table 1). 930 (1.5%) were 18 years or younger. Of those older than 18 years, the median age was 70 years (IQR 55–82). The age distribution of patients varied among countries, between a median of 10 years in Poland, where a large proportion of included patients were children, and 73 years in the United Kingdom (Supplementary Figure 2). 34 674 (58%) patients were male.

The most frequently reported symptoms were fever, cough and shortness of breath (Table 2). Fever, cough and shortness of breath were each significantly more prevalent in male patients, whereas less typical symptoms such as confusion, nausea and vomiting, diarrhoea, chest pain, headache and abdominal pain were more prevalent in female patients. The greatest sex-related difference was for nausea and vomiting, reported by 20% of female patients but only 14% of male patients. For most symptoms, the greatest prevalence was reported in adults aged between 30 and 60 years, decreasing toward extremities of age (Figure 2). Frequency of fatigue and confusion increased with age. Large numbers of patients had missing data for anorexia, severe dehydration, altered sense of taste and smell, and inability to walk as these were not included on all case report forms. Excluding these symptoms, few patients had missing data for the most prevalent symptoms.

Data on symptoms included in the composite criteria were missing for 314 patients. The



clinical criteria were calculated for the remaining 59 847 participants. Each set of criteria was met by a greater proportion of patients aged 30 to 60 years than toward either extreme of age (Figure 3). The criteria of fever plus at least one of cough or shortness of breath was met by 35 394 (59%) patients, but only 37% of those aged 18 years and under, and 51% of those aged 70 years or over. The most sensitive criteria were one or more of cough, shortness of breath, fever, muscle pains, or sore throat, met by 55 198 (92%) participants. These criteria were met by 89% aged 18 years and under, and 89% of those aged 70 years or over. Each set of criteria were met by a greater proportion of male than female patients (Table 2).

For the 4649 patients whose symptoms did not meet any of the assessed case definitions, the most frequent symptom was confusion (49%; Table 3). This rose with age to 67% of those aged 90 years or older. Nausea and vomiting, and abdominal pain were the most common symptoms for people less than 70 years old who did not meet any of the case definitions.

In the logistic regression models (Figure 4), similar associations between age and symptoms were seen after adjustment for sex and relationship of onset to admission date as in the unadjusted bar charts. Confusion increased with age. Nausea and vomiting, headache, abdominal pain, and sore throat were each more frequent in younger age groups, decreasing with age. The 95% CI for sex excluded one for most symptoms, but the point estimate was close to one for most. In these analyses, male patients had greater odds of fever, cough and shortness of breath, and lower odds of gastrointestinal symptoms of nausea and vomiting, diarrhoea, abdominal pain, chest pain, headache and sore throat. The median odds ratio for heterogeneity between countries was greater than the relationship with sex in all symptoms. It was of similar magnitude to the relationship with age for most symptoms. For each symptom, heterogeneity between countries was of a similar magnitude to the effect of age, and a greater magnitude than sex.

When we repeated the analysis excluding patients from the United Kingdom, the patterns of symptoms were similar to the main analysis (Supplementary Figure 3). The peak prevalence of fever, cough and shortness of breath was in 70- to 80-year-olds, and fatigue increased with age. This

resulted in a change to the calculated sensitivity of the clinical case definitions. Below the age of 50 years, each was less sensitive in the analysis excluding the United Kingdom than in the analysis including it; above the age of 70 years each was more sensitive (grey lines in Figure 3). Within countries, the baseline prevalence of each symptom varied but patterns within countries were broadly similar to the overall results (Supplementary figures 4–15).

## Discussion

In this large, multinational cohort, we found that symptoms for people admitted to hospital with Covid-19 varied by age and sex. Typical symptoms of fever, cough and shortness of breath were each more prevalent between the ages of 30 and 60 years. Commonly used clinical case definitions identified greater proportions of patients between the ages of 30 and 60 years, and fewer in childhood and older age.

This is the first large assessment of Covid-19 symptoms by age. The presence of atypical symptoms in older adults has been recognised [26] but not evaluated in a large international cohort. Liu and colleagues [27] found similar distributions of symptoms between older and younger patients with Covid-19, but their older cohort had a median age of 68 years, which is younger than the median age of our total cohort. The finding of atypical presentations among older patients with Covid-19 correlates with similar findings of atypical presentations for pneumonia, bacteraemia and coronary artery disease [28, 29]. Lower prevalence of symptoms in children and young people has been recognised [30, 31], but no large international cohorts collecting data systematically from both adults and children been reported. Separate analyses on the ISARIC-4C data have identified clustering of symptoms in children [32] and adults [33]. In each, fever, cough and shortness of breath clustered as frequently co-occurring symptoms [32, 33]. In children, the next most frequent cluster consisted of systemic, enteric and mucocutaneous symptoms [32]; for adults, other clusters consisted of non-specific viral symptoms, gastrointestinal symptoms, upper respiratory symptoms, neurological symptoms, and symptoms of bronchospasm [33]. These data were included in this

global dataset so the results of these analyses are not independent of our results.

The differences in symptoms by sex were statistically significant but generally of small magnitude. Adjusted for sex and country, the common symptoms of fever, cough and shortness of breath were more common in male patients, whereas all other symptoms were equal or more common in female patients. A cohort of non-hospitalized patients with Covid-19 in Poland found greater differences in symptoms of lack of appetite (55% of women, 36% of men) and taste disorder (53% women, 40% men) [34].

Our results suggest considerable heterogeneity among countries. We have not attempted to elicit reasons for heterogeneity, which may include differences in how patients present to hospital, how they describe their symptoms, and hospitals' criteria for admission and testing. It might also reflect differential recruitment to the study, as sites in some countries were unable to recruit confused patients due to requirements for consent, whereas in other countries the requirement for consent had been waived or assent could be obtained from a proxy. An international review of reported Covid-19 symptoms [14] found substantial variation. We explored the effect of this heterogeneity in the regression models using country as a random effect, and by repeating the analysis excluding the largest country. Each suggested an underlying pattern of lower frequencies of typical symptoms in children and older adults. Therefore, although the prevalence of each symptom reported in this study may not generalize to all settings, we have evidence to support the need to be alert to age-dependent differences across countries.

The size of this cohort is a strength. However, more than 80% of patients were recruited in a single country, and less than 1% of patients were recruited from lower-middle or low-income countries. The cohort also represents older age groups better than young ones, with only 1.8% of the cohort aged 18 years or younger. Combined with the known heterogeneity between countries, this limits the generalizability of estimates of symptom prevalence. More broadly, there is a shortage of information to guide practice outside high-income countries: a recent scoping review of clinical characteristics of Covid-19 identified no large cohorts in non-high-income countries except

China [14].

This analysis included only patients who were admitted to hospital and tested for SARS-CoV-2. This patient population is more likely to be severely unwell and more likely to exhibit symptoms typically associated with Covid-19 than people who are being managed in the community or whose disease has not been recognised. This might suggest that the reporting of 'typical' Covid-19 symptoms in this cohort is likely to be an overestimate of the population prevalence. Symptoms associated with less severe disease might be underestimated in this cohort. Symptoms are subjective and cannot be externally verified. Some differences for children may reflect that symptoms could only be recorded if a caregiver recognised the symptom or the child had the appropriate vocabulary to describe it. Similarly, some symptoms may be under-reported in elderly patients if there are difficulties in communication, for example due to delirium.

The absence of a control group of patients without Covid-19 in this dataset prevented estimation of specificity or positive and negative predictive values. This prevents us from advocating changes to clinical case definitions, as such decisions inevitably require a balance of false-positive and false-negative rates.

Our results suggest that reliance on clinical case definitions may result in missing cases of Covid-19, especially among children and older adults. While healthcare professionals assessing patients can make a broader assessment of a patient's condition, non-healthcare professionals making decisions regarding isolation or exclusion from activities may adhere to the criteria more strictly. Reported prevalence of Covid-19 may also rely on strict interpretation of case definitions. In settings where comprehensive contact tracing is planned, or there is easy access to microbiological testing, a highly sensitive case definition is desirable. However, where decisions are based on clinical diagnoses, it is important to recognise other pathogens that can cause similar constellations of symptoms. This is particularly important if a treatment could be offered for an alternative diagnosis, such as influenza. Addition of symptoms such as confusion or gastrointestinal symptoms to the Covid-19 case definition could increase sensitivity, but at a cost of reduced specificity. Changes in

the senses of taste and smell have recently been added to case definitions. Our data suggest that these criteria would detect only a small proportion of patients admitted to hospital with Covid-19 who were not included by other definitions.

These results highlight the need to consider Covid-19 even if individuals do not display typical symptoms of the disease. This is especially the case in children and older adults. Given that our results are likely to overestimate the sensitivity of the clinical criteria currently used to identify patients for SARS-CoV-2 testing, our results suggest a lower limit to the proportion of people in the community with Covid-19 who would not be identified. Addition of confusion as a symptom would increase the sensitivity of case definitions for older adults; and inclusion of nausea and vomiting or abdominal pain would increase sensitivity for children and young adults. The high proportion of asymptomatic patients identified in patients aged 10 to 30 years, in spite of this cohort not being eligible for hospital admission in many countries, suggests that universal screening in these ages could be beneficial when there is widespread community circulation of Covid-19. Ongoing data collection outside high-income countries is needed to establish whether alternative case definitions are needed in different settings. Work is also ongoing to determine whether some constellations of symptoms are associated with better or poorer outcomes than others.

## ISARIC Clinical Characterisation Group

Sheryl Ann Abdukahil, Ryuzo Abe, Laurent Abel, Lara Absil, Andrew Acker, Shingo Adachi, Elisabeth Adam, Diana Adrião, Kate Ainscough, Ali Ait Hssain, Younes Ait Tamlihat, Takako Akimoto, Tala Al-Dabbous, Abdulrahman Al-Fares, Eman Al Qasim, Razi Alalqam, Beatrice Alex, Kévin Alexandre, Huda Alfoudri, Kazali Enagnon Alidjnou, Jeffrey Aliudin, Clotilde Allavena, Nathalie Allou, João Alves, Rita Alves, Maria Amaral, Heidi Ammerlaan, Phoebe Ampaw, Roberto Andini, Claire Andrejak, Andrea Angheben, François Angoulvant, Séverine Ansart, Massimo Antonelli, Carlos Alexandre Antunes De Brito, Yaseen Arabi, Irene Aragao, Antonio Arcadipane, Lukas Arenz, Jean-Benoît Arlet, Christel Arnold-Day, Lovkesh Arora, Elise Artaud-Macari, Angel Asensio, Jean Baptiste Assie, Anika Atique,

314 Johann Auchabie, Hugues Aumaitre, Laurène Azemar, Cécile Azoulay, Benjamin Bach, Delphine  
315 Bachelet, J. Kenneth Baillie, Erica Bak, Agamemnon Bakakos, Firouzé Banisadr, Renata Barbalho,  
316 Wendy S. Barclay, Michaela Barnikel, Audrey Barrelet, Cleide Barrigoto, Romain Basmaci, Diego  
317 Fernando Bautista Rincon, Alexandra Bedossa, Sylvie Behilill, Aleksandr Beljantsev, David Bellemare,  
318 Anna Beltrame, Marine Beluze, Nicolas Benech, Dehbia Benkerrou, Suzanne Bennett, Luís Bento,  
319 Jan-Erik Berdal, Delphine Bergeaud, Lorenzo Bertolino, Simon Bessis, Sybille Bevilacqua, Krishna  
320 Bhavsar, Felwa Bin Humaid, François Bissuel, Patrick Biston, Laurent Bitker, Pablo Blanco-Schweizer,  
321 Mathieu Blot, Filomena Boccia, Debby Bogaert, François Bompert, Gareth Booth, Diogo Borges,  
322 Raphaël Borie, Jeannet Bos, Hans Martin Bosse, Elisabeth Botelho-Nevers, Lila Bouadma, Olivier  
323 Bouchaud, Sabelline Bouchez, Dounia Bouhmani, Damien Bouhour, Kévin Bouiller, Laurence Bouillet,  
324 Camille Bouisse, Anne-Sophie Boureau, Maude Bouscambert, Jason Bouziotis, Bianca Boxma,  
325 Marielle Boyer-Besseyre, Maria Boylan, Cynthia Braga, Timo Brandenburger, Luca Brazzi, Dorothy  
326 Breen, Patrick Breen, Kathy Brickell, Nicolas Brozzi, Nina Buchtele, Christian Buesaquillo, Polina  
327 Bugaeva, Marielle Buisson, Erlina Burhan, Ingrid G. Bustos, Denis Butnaru, Sheila Cárcel, André  
328 Cabie, Susana Cabral, Eder Caceres, Mia Callahan, Kate Calligy, Jose Andres Calvache, João Camões,  
329 Valentine Campana, Paul Campbell, Cecilia Canepa, Mireia Cantero, Pauline Caraux-Paz, Filipa  
330 Cardoso, Filipe Cardoso, Sofia Cardoso, Simone Carelli, Nicolas Carlier, Gayle Carney, Chloe  
331 Carpenter, Marie-Christine Carret, François Martin Carrier, Gail Carson, Maire-Laure Casanova,  
332 Mariana Cascão, José Casimiro, Bailey Cassandra, Silvia Castañeda, Nidyanara Castanheira, Guylaine  
333 Castor-Alexandre, Henry Castrillón, Ivo Castro, Ana Catarino, François-Xavier Catherine, Roberta  
334 Cavalin, Giulio Giovanni Cavalli, Alexandros Cavayas, Adrian Ceccato, Minerva Cervantes-Gonzalez,  
335 Anissa Chair, Catherine Chakveatz, Adrienne Chan, Meera Chand, Julie Chas, Camille Chassin,  
336 Anjellica Chen, Yih-Sharng Chen, Matthew Pellan Cheng, Antoine Cheret, Thibault Chiarabini, Julian  
337 Chica, Catherine Chirouze, Davide Chiumello, Hwa Jin Cho, Sung Min Cho, Bernard Cholley, Jose  
338 Pedro Cidade, Jose Miguel Cisneros Herreros, Barbara Wanjiru Citarella, Anna Ciullo, Jennifer Clarke,  
339 Sara Clohisey, Cassidy Codan, Caitriona Cody, Alexandra Coelho, Gwenhaël Colin, Michael Collins,

340 Sebastiano Maria Colombo, Pamela Combs, JP Connelly, Marie Connor, Anne Conrad, Sofía  
341 Contreras, Graham S. Cooke, Mary Copland, Hugues Cordel, Amanda Corley, Sarah Cormican, Sabine  
342 Cornelis, Arianne Joy Corpuz, Grégory Corvaisier, Camille Couffignal, Sandrine Couffin-Cadiergues,  
343 Roxane Courtois, Charles Crepy D'Orleans, Sabine Croonen, Gloria Crawl, Jonathan Crump, Claudina  
344 Cruz, Marc Csete, Alberto Cucino, Caroline Cullen, Matthew Cummings, Gerard Curley, Elodie Curlier,  
345 Paula Custodio, Frédérick D'Aragon, Ana Da Silva Filipe, Charlene Da Silveira, Eric D'Ortenzio, Al-  
346 Awwab Dabaliz, Heidi Dalton, Jo Dalton, Nick Daneman, Emmanuelle A. Dankwa, Jorge Dantas,  
347 Nathalie De Castro, Diego De Mendoza, Rafael Freitas De Oliveira França, Rosanna De Rosa, Thushan  
348 De Silva, Peter De Vries, David Dean, Marie-Pierre Debray, William Dechert, Lauren Deconninck,  
349 Romain Decours, Isabelle Delacroix, Karen Delavigne, Ionna Deligiannis, Andrea Dell'amore, Pierre  
350 Delobel, Elisa Demonchy, Emmanuelle Denis, Dominique Deplanque, Dominique Deplanque, Pieter  
351 Depuydt, Mehul Desai, Diane Descamps, Mathilde Desvallée, Santi Rahayu Dewayanti, Alpha Diallo,  
352 Sylvain Diamantis, André Dias, Juan Jose Diaz Diaz, Rodrigo Diaz, Kévin Didier, Jean-Luc Diehl, Wim  
353 Dieperink, Jérôme Dimet, Vincent Dinot, Alphonsine Diouf, Yael Dishon, Félix Djossou, Annemarie B.  
354 Docherty, Andy Dong, Christl A. Donnelly, Maria Donnelly, Chloe Donohue, Céline Dorival, James  
355 Joshua Douglas, Renee Douma, Nathalie Dournon, Triona Downer, Mark Downing, Tom Drake,  
356 Vincent Dubee, François Dubos, Alexandra Ducancelle, Susanne Dudman, Jake Dunning, Emanuele  
357 Durante Mangoni, Silvia Duranti, Lucian Durham III, Bertrand Dussol, Xavier Duval, Anne Margarita  
358 Dyrhol-Riise, Carla Eira, José Ernesto Vidal, Mohammed El Sanharawi, Subbarao Elapavaluru, Brigitte  
359 Elharrar, Natalie Elkheir, Jacobien Ellerbroek, Rachael Ellis, Philippine Eloy, Tarek Elshazly, Isabelle  
360 Enderle, Ilka Engelmann, Vincent Enouf, Olivier Epaulard, Mariano Esperatti, Hélène Esperou, Marina  
361 Esposito-Farese, João Estevão, Manuel Etienne, Manuel Etienne, Nadia Ettalhaoui, Anna Greti  
362 Everding, Mirjam Evers, Isabelle Fabre, Amna Faheem, Arabella Fahy, Cameron J. Fairfield, Pedro  
363 Faria, Nataly Farshait, Arie Zainul Fatoni, Karine Faure, Mohamed Fayed, Niamh Feely, Jorge  
364 Fernandes, Marília Fernandes, Susana Fernandes, Joana Ferrão, Eglantine Ferrand Devouge, Mário  
365 Ferraz, Benigno Ferreira, Ricard Ferrer-Roca, Claudia Figueiredo-Mello, Clara Fleteau, Tom Fletcher,

366 Letizia Lucia Florio, Claire Foley, Victor Fomin, Claudio Duarte Fonseca, Tatiana Fonseca, Patricia  
367 Fontela, Simon Forsyth, Giuseppe Foti, Erwan Fourn, Rob Fowler, Diego Franch-Llasat, Christophe  
368 Fraser, John Fraser, Marcela Vieira Freire, Ana Freitas Ribeiro, Caren Friedrich, Stéphane Fry, Nora  
369 Fuentes, Masahiro Fukuda, Joan Gómez-Junyent, Valérie Gaborieau, Benoît Gachet, Rostane Gaci,  
370 Massimo Gagliardi, Jean-Charles Gagnard, Amandine Gagneux-Brunon, Sérgio Gaião, Phil Gallagher,  
371 Elena Gallego Curto, Carrol Gamble, Arthur Garan, Esteban Garcia-Gallo, Rebekha Garcia, Denis  
372 Garot, Valérie Garrait, Nathalie Gault, Aisling Gavin, Alexandre Gaymard, Johannes Gebauer, Louis  
373 Gerbaud Morlaes, Nuno Germano, Jade Ghosn, Marco Giani, Carlo Giaquinto, Jess Gibson, Tristan  
374 Gigante, Morgane Gilg, Guillermo Giordano, Michelle Girvan, Valérie Gissot, Gezy Giwangkancana,  
375 Daniel Glikman, Petr Glybochko, Eric Gnall, Geraldine Goco, François Goehring, Siri Goepel, Jean-  
376 Christophe Goffard, Jonathan Golob, Isabelle Gorenne, Cécile Goujard, Tiphaine Goulenok, Margarete  
377 Grable, Edward Wilson Grandin, Pascal Granier, Giacomo Grasselli, Christopher A. Green, William  
378 Greenhalf, Segolène Greffe, Domenico Luca Grieco, Matthew Griffie, Fiona Griffiths, Ioana Grigoras,  
379 Albert Groenendijk, Anja Grosse Lordemann, Heidi Gruner, Yusing Gu, Jérémie Guedj, Dewi Guellec,  
380 Anne-Marie Guerguerian, Daniela Guerreiro, Romain Guery, Anne Guillaumot, Laurent Guilleminault,  
381 Thomas Guimard, Daniel Haber, Sheeba Hakak, Matthew Hall, Sophie Halpin, Ansley Hamer, Rebecca  
382 Hamidfar, Terese Hammond, Hayley Hardwick, Kristen Harley, Ewen M. Harrison, Janet Harrison,  
383 Leanne Hays, Jan Heerman, Lars Heggelund, Ross Hendry, Martina Hennessy, Aquiles Henriquez-  
384 Trujillo, Maxime Hentzien, Jaime Hernandez-Montfort, Astarini Hidayah, Dawn Higgins, Eibhilin  
385 Higgins, Samuel Hinton, Ana Hipólito -Reis, Hiroaki Hiraiwa, Julian A. Hiscox, Antonia Ying Wai Ho,  
386 Alexandre Hoctin, Isabelle Hoffmann, Oscar Hoiting, Rebecca Holt, Jan Cato Holter, Peter Horby,  
387 Juan Pablo Horcajada, Koji Hoshino, Kota Hoshino, Catherine L. Hough, Jimmy Ming-Yang Hsu, Jean-  
388 Sébastien Hulot, Samreen Ijaz, Hajnal-Gabriela Illes, Hugo Inácio, Carmen Infante Dominguez, Elias  
389 Iosifidis, Lacey Irvine, Sarah Isgett, Tiago Isidoro, Margaux Isnard, Junji Itai, Daniel Ivulich, Salma  
390 Jaafoura, Julien Jabot, Clare Jackson, Nina Jamieson, Stéphane Jaureguiberry, Jeffrey Javidfar, Zabbe  
391 Jean- Benoît, Florence Jego, Synne Jenum, Ruth Jimbo Sotomayor, Ruth Noemí Jorge García, Cédric



392 Joseph, Mark Joseph, Philippe Jouvét, Hanna Jung, Ouifiya Kafif, Florentia Kaguelidou, Sabina Kali,  
393 Smaragdi Kalomoiri, Darshana Hewa Kandamby, Chris Kandel, Ravi Kant, Christiana Kartsonaki,  
394 Daisuke Kasugai, Kevin Katz, Simreen Kaur Johal, Sean Keating, Andrea Kelly, Sadie Kelly, Lisa  
395 Kennedy, Kalynn Kennon, Younes Kerroumi, Evelyne Kestelyn, Imrana Khalid, Antoine Khalil, Coralie  
396 Khan, Irfan Khan, Michelle E Kho, Saye Khoo, Yuri Kida, Peter Kiiza, Anders Benjamin Kildal, Antoine  
397 Kimmoun, Detlef Kindgen-Milles, Nobuya Kitamura, Paul Klenerman, Gry Kloumann Bekken, Stephen  
398 Knight, Robin Kobbe, Malte Kohns Vasconcelos, Volkan Korten, Caroline Kosgei, Karolina Krawczyk,  
399 Pavan Kumar Vecham, Deepali Kumar, Ethan Kurtzman, Demetrios Kutsogiannis, Konstantinos  
400 Kyriakoulis, Erwan L'her, Marie Lachatre, Marie Lacoste, John G Laffey, Marie Lagrange, Fabrice  
401 Laine, Marc Lambert, François Lamontagne, Marie Langelot-Richard, Eka Yudha Lantang, Marina  
402 Lanza, Cédric Laouénan, Samira Laribi, Delphine Lariviere, Odile Launay, Yoan Lavie-Badie, Andrew  
403 Law, Clément Le Bihan, Cyril Le Bris, Eve Le Coustumier, Georges Le Falher, Sylvie Le Gac, Quentin Le  
404 Hingrat, Marion Le Maréchal, Soizic Le Mestre, Vincent Le Moing, Hervé Le Nagard, Paul Le Turnier,  
405 Rafael León, Minh Le, Marta Leal Santos, Ema Leal, James Lee, Su Hwan Lee, Todd Lee, Gary  
406 Leeming, Bénédicte Lefebvre, Laurent Lefebvre, Benjamin Lefevre, François Lellouche, Adrien  
407 Lemaigren, Véronique Lemee, Gretchen Lemmink, Michela Leone, Quentin Lepiller, François-Xavier  
408 Lescure, Olivier Lesens, Mathieu Lesouhaitier, Claire Levy-Marchal, Bruno Levy, Yves Levy, Gianluigi  
409 Li Bassi, Janet Liang, Wei Shen Lim, Bruno Lina, Andreas Lind, Guillaume Lingas, Sylvie Lion-Daolio,  
410 Keibun Liu, Antonio Loforte, Navy Lolong, Diogo Lopes, Dalia Lopez-Colon, Paul Loubet, Jean  
411 Christophe Lucet, Carlos M. Luna, Olguta Lungu, Liem Luong, Dominique Luton, Ruth Lyons, Fredrik  
412 Müller, Karl Erik Müller, Olavi Maasikas, Sarah Macdonald, Moïse Machado, Gabrielle Macheda, Juan  
413 Macias Sanchez, Jai Madhok, Rafael Mahieu, Sophie Mahy, Lars Siegfried Maier, Mylène Maillet,  
414 Thomas Maitre, Maximilian Malferttheiner, Nadia Malik, Fernando Maltez, Denis Malvy, Marina  
415 Mambert, Victoria Manda, Jose M. Mandeï, Edmund Manning, Aldric Manuel, Ceila Maria Sant`Ana  
416 Malaque, Flávio Marino, Carolline De Araújo Mariz, Charbel Maroun Eid, Ana Marques, Catherine  
417 Marquis, Brian Marsh, Laura Marsh, John Marshall, Celina Turchi Martelli, Guillaume Martin-Blondel,

418 Ignacio Martin-Loeches, Alejandro Martin-Quiros, Dori-Ann Martin, Emily Martin, Martin Martinot,  
419 Caroline Martins Rego, Ana Martins, João Martins, Gennaro Martucci, Eva Miranda Marwali, Juan  
420 Fernando Masa Jimenez, David Maslove, Sabina Mason, Moshe Matan, Daniel Mathieu, Mathieu  
421 Mattei, Romans Matulevics, Laurence Maulin, Natalie Mc Evoy, Aine McCarthy, Anne McCarthy,  
422 Colin McCloskey, Rachael McConnochie, Sherry McDermott, Sarah McDonald, Samuel McElwee,  
423 Natalie McEvoy, Allison McGeer, Niki McGuinness, Kenneth A. McLean, Bairbre McNicholas, Edel  
424 Meaney, Cécile Mear-Passard, Maggie Mechlin, Ferruccio Mele, Kusum Menon, France Mentré,  
425 Alexander J. Mentzer, Noémie Mercier, Antoine Merckx, Blake Mergler, Laura Merson, António  
426 Mesquita, Agnès Meybeck, Alison M. Meynert, Vanina Meyssonier, Amina Meziane, Medhi Mezidi,  
427 Céline Michelanglei, Vladislav Mihnovitš, Hugo Miranda Maldonado, Mary Mone, Asma Moin, David  
428 Molina, Elena Molinos, Agostinho Monteiro, Claudia Montes, Giorgia Montrucchio, Sarah Moore,  
429 Shona C. Moore, Lina Morales-Cely, Lucia Moro, Diego Rolando Morocho Tuttillo, Ana Motos, Hugo  
430 Mouquet, Clara Mouton Perrot, Julien Moyet, Jimmy Mullaert, Daniel Munblit, Derek Murphy,  
431 Marlène Murris, Dimitra Melia Myrodia, Yohan N'guyen, Nadège Neant, Holger Neb, Nikita A  
432 Nekliudov, Raul Neto, Emily Neumann, Bernardo Neves, Pauline Yeung Ng, Wing Yiu Ng, Orna Ni  
433 Choileain, Alistair Nichol, Stephanie Nonas, Marion Noret, Lisa Norman, Alessandra Notari, Mahdad  
434 Noursadeghi, Karolina Nowicka, Saad Nseir, Jose I Nunez, Elsa Nyamankolly, Max O'Donnell, Katie  
435 O'Hearn, Conar O'Neil, Giovanna Occhipinti, Tawnya Ogston, Takayuki Ogura, Tak-Hyuk Oh,  
436 Shinichiro Ohshimo, Budha Charan Singh Oinam, Ana Pinho Oliveira, João Oliveira, Piero Olliaro,  
437 David S. Y. Ong, Wilna Oosthuyzen, Peter J.M. Openshaw, Claudia Milena Orozco-Chamorro, Andrés  
438 Orquera, Javier Osatnik, Nadia Ouamara, Rachida Ouissa, Clark Owyang, Eric Oziol, Diana Póvoas,  
439 Maïder Pagadoy, Justine Pages, Mario Palacios, Massimo Palmarini, Giovanna Panarello, Prasan  
440 Kumar Panda, Mauro Panigada, Nathalie Pansu, Aurélie Papadopoulos, Briseida Parra, Jérémie  
441 Pasquier, Fabian Patauner, Luís Patrão, Christelle Paul, Mical Paul, Jorge Paulos, William A. Paxton,  
442 Jean-François Payen, India Pearse, Giles J Peek, Florent Peelman, Nathan Peiffer-Smadja, Vincent  
443 Peigne, Mare Pejkovska, Ithan D. Peltan, Rui Pereira, Daniel Perez, Thomas Perpoint, Antonio

444 Pesenti, Lenka Petroušová, Ventzislava Petrov-Sanchez, Gilles Peytavin, Scott Pharand, Michael  
 445 Piagnerelli, Walter Picard, Olivier Picone, Marie Piel-Julian, Carola Pierobon, Carlos Pimentel, Lionel  
 446 Piroth, Riinu Pius, Simone Piva, Laurent Plantier, Daniel Plotkin, Julien Poissy, Maria Pokorska-  
 447 Spiewak, Sergio Poli, Georgios Pollakis, Jolanta Popielska, Douwe F. Postma, Pedro Pova, Jeff Powis,  
 448 Sofia Prapa, Christian Prebensen, Jean-Charles Preiser, Vincent Prestre, Nicholas Price, Anton  
 449 Prinssen, Mark G. Pritchard, Lúcia Proença, Oriane Puéchal, Gregory Purcell, Luisa Quesada, Else  
 450 Quist-Paulsen, Mohammed Quraishi, Indrek Rätsep, Bernhard Rössler, Christian Rabaud, Marie  
 451 Rafiq, Gabrielle Ragazzo, Fernando Rainieri, Nagarajan Ramakrishnan, Kollengode Ramanathan,  
 452 Blandine Rammaert, Christophe Rapp, Menaldi Rasmin, Cornelius Rau, Stanislas Rebaudet, Sarah  
 453 Redl, Brenda Reeve, Liadain Reid, Renato Reis, Jonathan Remppis, Martine Remy, Hanna Renk,  
 454 Liliana Resende, Anne-Sophie Resseguier, Matthieu Revest, Oleksa Rewa, Luis Felipe Reyes, David  
 455 Richardson, Denise Richardson, Laurent Richier, Jordi Riera, Ana Lúcia Rios, Asgar Rishu, Patrick  
 456 Rispal, Karine Risso, Maria Angelica Rivera Nuñez, Nicholas Rizer, André Roberto, Stephanie Roberts,  
 457 David L. Robertson, Olivier Robineau, Ferran Roche-Campo, Paola Rodari, Simão Rodeia, Julia  
 458 Rodriguez Abreu, Emmanuel Roilides, Amanda Rojek, Juliette Romaru, Roberto Roncon-Albuquerque  
 459 Jr, Mélanie Roriz, Manuel Rosa-Calatrava, Michael Rose, Dorothea Rosenberger, Andrea Rossanese,  
 460 Bénédicte Rossignol, Patrick Rossignol, Carine Roy, Benoît Roze, Clark D. Russell, Steffi Ryckaert,  
 461 Aleksander Rygh Holten, Xavier Sánchez Choez, Isabela Saba, Musharaf Sadat, Nadia Saidani,  
 462 Leonardo Salazar, Gabriele Sales, Stéphane Sallaberry, Hélène Salvator, Angel Sanchez-Miralles,  
 463 Olivier Sanchez, Vanessa Sancho-Shimizu, Gyan Sandhu, Oana Sandulescu, Marlene Santos, Shirley  
 464 Sarfo-Mensah, Benjamine Sarton, Egle Saviciute, Parthena Savvidou, Joshua Scarsbrook, Tjard  
 465 Schermer, Arnaud Scherpereel, Marion Schneider, Stephan Schroll, Michael Schwameis, James Scott-  
 466 Brown, Janet T. Scott, Nicholas Sedillot, Tamara Seitz, Caroline Semaille, Malcolm G. Semple, Eric  
 467 Senneville, Filipa Sequeira, Tânia Sequeira, Ellen Shadowitz, Mohammad Shamsah, Pratima Sharma,  
 468 Catherine A. Shaw, Victoria Shaw, Nisreen Shiban, Nobuaki Shime, Hiroaki Shimizu, Keiki Shimizu,  
 469 Sally Shrapnel, Hoi Ping Shum, Nassima Si Mohammed, Louise Sigfrid, Catarina Silva, Maria Joao

470 Silva, Wai Ching Sin, Vegard Skogen, Sue Smith, Benjamin Smood, Michelle Smyth, Morgane  
471 Snacken, Dominic So, Monserrat Solis, Joshua Solomon, Tom Solomon, Emily Somers, Agnès  
472 Sommet, Myung Jin Song, Rima Song, Tae Song, Michael Sonntagbauer, Edouard Soum, Maria Sousa  
473 Uva, Marta Sousa, Vicente Souza-Dantas, Alexandra Sperry, Shiranee Sriskandan, Thomas  
474 Staudinger, Stephanie-Susanne Stecher, Ymkje Stienstra, Birgitte Stiksrud, Adrian Streinu-Cercel,  
475 Anca Streinu-Cercel, Samantha Strudwick, Ami Stuart, David Stuart, Asfia Sultana, Charlotte  
476 Summers, Magdalena Surovcová Andrey A Svistunov, Konstantinos Syrigos, Jaques Sztajnbok,  
477 Konstanty Szuldrzynski, François Téoulé, Shirin Tabrizi, Lysa Taghersset, Ewa Talarek, Sara Taleb,  
478 Jelmer Talsma, Le Van Tan, Hiroyuki Tanaka, Taku Tanaka, Hayato Taniguchi, Coralie Tardivon, Pierre  
479 Tattevin, M Azhari Taufik, Richard S. Tedder, João Teixeira, Marie-Capucine Tellier, Pleun Terpstra,  
480 Olivier Terrier, Nicolas Terzi, Hubert Tessier-Grenier, Vincent Thibault, Simon-Djamel Thiberville,  
481 Benoît Thill, A.A. Roger Thompson, Shaun Thompson, David Thomson, Emma C. Thomson, Duong  
482 Bich Thuy, Ryan S. Thwaites, Peter S. Timashev, Jean-François Timsit, Bharath Kumar Tirupakuzhi  
483 Vijayaraghavan, Maria Toki, Kristian Tonby, Rosario Maria Torres Santos-Olmo, Antoni Torres,  
484 Margarida Torres, Théo Trioux, Huynh Trung Trieu, Cécile Tromeur, Ioannis Trontzas, Jonathan  
485 Troost, Tiffany Trouillon, Christelle Tual, Sarah Tubiana, Helen Tuite, Lance C.W. Turtle, Pawel  
486 Twardowski, Makoto Uchiyama, Roman Ullrich, Alberto Uribe, Asad Usman, Luís Val-Flores, Stijn Van  
487 De Velde, Marcel Van Den Berge, Machteld Van Der Feltz, Nicky Van Der Vekens, Peter Van Der  
488 Voort, Sylvie Van Der Werf, Marlice Van Dyk, Laura Van Gulik, Jarne Van Hattem, Steven Van  
489 Lelyveld, Carolien Van Netten, Noémie Vanel, Henk Vanoverschelde, Charline Vauchy, Aurélie  
490 Veislinger, Jorge Velazco, Sara Ventura, Annelies Verbon, César Vieira, Joy Ann Villanueva, Judit  
491 Villar, Pierre-Marc Villeneuve, Andrea Villoldo, Nguyen Van Vinh Chau, Benoit Visseaux, Hannah  
492 Visser, Aapeli Vuorinen, Fanny Vuotto, Chih-Hsien Wang, Jia Wei, Katharina Weil, Sanne Wesselius,  
493 Murray Wham, Bryan Whelan, Nicole White, Aurélie Wiedemann, Keith Wille, Evert-Jan Wils, Ioannis  
494 Xynogalas, Jacky Y Suen, Sophie Yacoub, Masaki Yamazaki, Yazdan Yazdanpanah, Cécile Yelnik,  
495 Stephanie Yerkovich, Toshiki Yokoyama, Hodane Yonis, Paul Young, Saptadi Yuliarto, Marion Zabbe,

Kai Zacharowski, Maram Zahran, Maria Zambon, Alberto Zanella, Konrad Zawadka, Hiba Zayyad, Alexander Zoufaly, David Zucman; The PETAL Network Investigators, The Western Australian Covid-19 Research Response.

(Author contributions are listed in the supplementary material.)

## Funding

This work was supported by the Department for International Development and Wellcome Trust [215091/Z/18/Z]; the Bill and Melinda Gates Foundation [OPP1209135]. Country-specific support was provided by the Canadian Institutes of Health Research Coronavirus Rapid Research Funding Opportunity [OV2170359]; the Health Research Board Ireland [CTN Award 2014-012]; National Institute for Health Research (NIHR) [award CO-CIN-01]; the Medical Research Council (MRC) [grant MC\_PC\_19059]; the NIHR Health Protection Research Unit (HPRU) in Emerging and Zoonotic Infections at University of Liverpool in partnership with Public Health England (PHE), in collaboration with Liverpool School of Tropical Medicine and the University of Oxford [award 200907]; NIHR HPRU in Respiratory Infections at Imperial College London with PHE [award 200927]; Liverpool Experimental Cancer Medicine Centre [grant reference C18616/A25153]; NIHR Biomedical Research Centre at Imperial College London [IS-BRC-1215-20013]; EU Platform for European Preparedness Against (Re-)emerging Epidemics (PREPARE) [FP7 project 602525]; National Institutes of Health (NIH) [UL1TR002240]; and NIHR Clinical Research Network infrastructure support. We acknowledge the generous support of all ISARIC Partners who have contributed data and expertise to this analysis, with or without dedicated funding. The views expressed are those of the authors and not necessarily those of the funders or institutions listed above.

## Conflicts of Interest

M. Cheng declares grants from McGill Interdisciplinary Initiative in Infection and Immunity, and Canadian Institutes of Health Research; and personal fees from GEn1E Lifesciences (as a member of

the scientific advisory board) and nplex biosciences (as a member of the scientific advisory board); M. Cummings and M. O'Donnell participated as investigators for completed and ongoing clinical trials evaluating the efficacy and safety of remdesivir (sponsored by Gilead Sciences) and convalescent plasma (sponsored by Amazon), in hospitalized patients with Covid-19 – support for this work is paid to Columbia University; J. C. Holter declared grants from Research Council of Norway [grant 312780], and Vivaldi Invest A/S owned by Jon Stephenson von Tetzchner, during the conduct of the study; A.Kimmoun declared personal fees (payment for lectures) from Baxter, Aguetant, Aspen; D. Kumar declared grants and personal fees from Roche, GSK and Merck, and personal fees from Pfizer and Sanofi; F.X. Lescure declared personal fees (payment for lectures) from Gilead, MSD; and travel/accommodation/meeting expenses from Astellas, Eumedica, MSD;bA. Pesenti declared personal fees from Maquet, Novalung/Xenios, Baxter, and Boehringer Ingelheim; R.Tedder reports grants from MRC/UKRI during the conduct of the study, and has a patent United Kingdom Patent Application No. 2014047.1 “SARS-CoV-2 antibody detection assay” issued; J. Troost declared personal fees from General Electric and Procter and Gamble.

## Acknowledgements

We are extremely grateful to the frontline clinical and research staff and volunteers, who collected this data in challenging circumstances, and the generosity of the patients and their families for their individual contributions in these difficult times. This work uses data provided by patients and collected by the health institutions and authorities in each country. In the UK, this study involves the National Health Service as part of their care and support #DataSavesLives. We also acknowledge the support of Jeremy J Farrar, Nahoko Shindo, Devika Dixit, Nipunie Rajapakse, Andrew Davison, David Barr, Lyndsey Castle, Martha Buckley, Debbie Malden, Katherine Newell, Kwame O'Neill, Emmanuelle Denis, Claire Petersen, Scott Mullaney, Sue MacFarlane, Nicole Maziere, Julien Martinez, Oslem Dincarslan, Annette Lake and the Irish Critical Care Trials Group. We appreciate the strong collaboration of the WHO Clinical Data Platform Team, including Silvia Bertagnolio, Soe Soe

545 Thwin, and Janet Diaz.

## 546 References

- 547 1. Fraser C, Riley S, Anderson RM, Ferguson NM. Factors that make an infectious disease  
548 outbreak controllable. *Proc Natl Acad Sci U S A* **2004**; 101(16): 6146-51.
- 549 2. Clemency BM, Varughese R, Scheafer DK, et al. Symptom criteria for COVID-19 testing of  
550 health care workers. *Acad Emerg Med* **2020**; 27(6): 469-74.
- 551 3. Lu H, Stratton CW, Tang YW. Outbreak of pneumonia of unknown etiology in Wuhan, China:  
552 The mystery and the miracle. *J Med Virol* **2020**; 92(4): 401-2.
- 553 4. Huang C, Wang Y, Li X, et al. Clinical features of patients infected with 2019 novel  
554 coronavirus in Wuhan, China. *Lancet* **2020**; 395(10223): 497-506.
- 555 5. Wang G, Chen W, Jin X, Chen YP. Description of COVID-19 cases along with the measures  
556 taken on prevention and control in Zhejiang, China. *J Med Virol* **2020**.
- 557 6. Guan WJ, Ni ZY, Hu Y, et al. Clinical characteristics of coronavirus disease 2019 in China. *N*  
558 *Engl J Med* **2020**; 382(18): 1708-20.
- 559 7. Liang WH, Guan WJ, Li CC, et al. Clinical characteristics and outcomes of hospitalised  
560 patients with COVID-19 treated in Hubei (epicentre) and outside Hubei (non-epicentre): a  
561 nationwide analysis of China. *Eur Respir J* **2020**; 55(6): 2000562.
- 562 8. Docherty AB, Harrison EM, Green CA, et al. Features of 20 133 UK patients in hospital with  
563 covid-19 using the ISARIC WHO Clinical Characterisation Protocol: prospective observational  
564 cohort study. *BMJ* **2020**; 369: m1985.
- 565 9. Giacomelli A, Pezzati L, Conti F, et al. Self-reported olfactory and taste disorders in patients  
566 with severe acute respiratory coronavirus 2 infection: A cross-sectional study. *Clin Infect Dis*  
567 **2020**; 71(15): 889-90.
- 568 10. Yan CH, Faraji F, Prajapati DP, Boone CE, DeConde AS. Association of chemosensory  
569 dysfunction and COVID-19 in patients presenting with influenza-like symptoms. *Int Forum*  
570 *Allergy Rhinol* **2020**; 10(7): 806-13.
- 571 11. World Health Organization. Global surveillance for COVID-19 caused by human infection  
572 with COVID-19 virus: Interim guidance. Geneva, Switzerland: World Health Organization,  
573 **2020**.
- 574 12. Centers for Disease Control and Prevention. Symptoms of coronavirus. Available at:  
575 <https://www.cdc.gov/coronavirus/2019-ncov/symptoms-testing/symptoms.html>. Accessed  
576 20 May 2020.
- 577 13. Public Health England. COVID-19: investigation and initial clinical management of possible  
578 cases. Available at: [https://www.gov.uk/government/publications/wuhan-novel-](https://www.gov.uk/government/publications/wuhan-novel-coronavirus-initial-investigation-of-possible-cases/investigation-and-initial-clinical-management-of-possible-cases-of-wuhan-novel-coronavirus-wn-cov-infection)  
579 [coronavirus-initial-investigation-of-possible-cases/investigation-and-initial-clinical-](https://www.gov.uk/government/publications/wuhan-novel-coronavirus-initial-investigation-of-possible-cases/investigation-and-initial-clinical-management-of-possible-cases-of-wuhan-novel-coronavirus-wn-cov-infection)  
580 [management-of-possible-cases-of-wuhan-novel-coronavirus-wn-cov-infection](https://www.gov.uk/government/publications/wuhan-novel-coronavirus-initial-investigation-of-possible-cases/investigation-and-initial-clinical-management-of-possible-cases-of-wuhan-novel-coronavirus-wn-cov-infection). Accessed 20  
581 May 2020.
- 582 14. Manoharan L, Cattrall JWS, Harris C, et al. Early clinical characteristics of Covid-19: scoping  
583 review. *MedRxiv* **2020**: 2020.07.31.20165738. [Preprint]. August 4, 2020 [cited 7 August  
584 2020]. Available from <https://doi.org/10.1101/2020.07.31.20165738>.
- 585 15. International Severe Acute Respiratory and Emerging Infection Consortium, World Health  
586 Organization. ISARIC/WHO Clinical Characterisation Protocol for Severe Emerging Infections,  
587 version 3.2: ISARIC, **2020**.
- 588 16. International Severe Acute Respiratory and Emerging Infection Consortium. COVID-19 CRF.  
589 Available at: <https://isaric.tghn.org/COVID-19-CRF/>. Accessed 21 August 2020.
- 590 17. Yang X, Yu Y, Xu J, et al. Clinical course and outcomes of critically ill patients with SARS-CoV-2  
591 pneumonia in Wuhan, China: a single-centered, retrospective, observational study. *Lancet*  
592 *Respir Med* **2020**; 8(5): 475-81.



18. Zhou F, Yu T, Du R, et al. Clinical course and risk factors for mortality of adult inpatients with COVID-19 in Wuhan, China: a retrospective cohort study. *Lancet* **2020**; 395(10229): 1054-62.
19. Dunning JW, Merson L, Rohde GGU, et al. Open source clinical science for emerging infections. *Lancet Infect Dis* **2014**; 14(1): 8-9.
20. ISARIC clinical characterisation group. Global outbreak research: harmony not hegemony. *Lancet Infect Dis* **2020**; 20(7): 770-2.
21. Hall M, Pritchard M, Dankwa E, et al. ISARIC COVID-19 clinical data report: 8 June 2020. *MedRxiv* **2020**: 2020.07.17.20155218 [Preprint]. July 25, 2020 [cited 7 August 2020]. Available from <https://doi.org/10.1101/2020.07.17.20155218>.
22. ISARIC 4C. ISARIC 4C protocols. Available at: <https://isaric4c.net/protocols/>. Accessed 26 August 2020.
23. COVID-19 Critical Care Consortium. COVID-19 Critical Care Consortium Trial Documents. Available at: <https://www.elso.org/COVID19/ECMOCARD.aspx>. Accessed 26 August 2020.
24. Munblit D, Nekliudov NA, Bugaeva P, et al. StopCOVID cohort: An observational study of 3,480 patients admitted to the Sechenov University hospital network in Moscow city for suspected COVID-19 infection. *Clin Infect Dis* **2020**.
25. Larsen K, Merlo J. Appropriate assessment of neighborhood effects on individual health: integrating random and fixed effects in multilevel logistic regression. *Am J Epidemiol* **2005**; 161(1): 81-8.
26. Lauretani F, Ravazzoni G, Roberti MF, et al. Assessment and treatment of older individuals with COVID 19 multi-system disease: Clinical and ethical implications. *Acta Biomed* **2020**; 91(2): 150-68.
27. Liu K, Chen Y, Lin R, Han K. Clinical features of COVID-19 in elderly patients: A comparison with young and middle-aged patients. *J Infect* **2020**; 80(6): e14-e8.
28. Jung YJ, Yoon JL, Kim HS, Lee AY, Kim MY, Cho JJ. Atypical clinical presentation of geriatric syndrome in elderly patients with pneumonia or coronary artery disease. *Ann Geriatr Med Res* **2018**; 21(4): 158-63.
29. Wester AL, Dunlop O, Melby KK, Dahle UR, Wyller TB. Age-related differences in symptoms, diagnosis and prognosis of bacteremia. *BMC Infect Dis* **2013**; 13: 346.
30. Lu X, Zhang L, Du H, et al. SARS-CoV-2 Infection in Children. *N Engl J Med* **2020**; 382(17): 1663-5.
31. Ludvigsson JF. Systematic review of COVID-19 in children shows milder cases and a better prognosis than adults. *Acta Paediatr* **2020**; 109: 1088-95.
32. Swann OV, Holden KA, Turtle L, et al. Clinical characteristics of children and young people admitted to hospital with covid-19 in United Kingdom: prospective multicentre observational cohort study. *BMJ* **2020**; 370: m3249.
33. Millar JE, Neyton L, Seth S, et al. Robust, reproducible clinical patterns in hospitalised patients with COVID-19. *MedRxiv* **2020**: 2020.08.14.20168088. [Preprint]. August 16, 2020 [cited 2 September 2020]. Available from: <https://doi.org/10.1101/2020.08.14.20168088>
34. Sierpiński R, Pinkas J, Jankowski M, et al. Sex differences in the frequency of gastrointestinal symptoms and olfactory or taste disorders in 1942 nonhospitalized patients with coronavirus disease 2019 (COVID-19). *Pol Arch Intern Med* **2020**; 130(6): 501-5.
35. World Bank. World Bank country and lending groups. Available at: <https://datahelpdesk.worldbank.org/knowledgebase/articles/906519-world-bank-country-and-lending-groups>.



## Tables

**Table 1. Patient demographics**

| Variable*                                                             | Overall<br>n = 60 161 | Sex                  |                    | P-value |
|-----------------------------------------------------------------------|-----------------------|----------------------|--------------------|---------|
|                                                                       |                       | Female<br>n = 25 487 | Male<br>n = 34 674 |         |
| Age (years) :median [IQR]                                             | 70 [54, 82]           | 72 [55, 83]          | 68 [54, 80]        | <0.001  |
| Age bands (years)                                                     |                       |                      |                    | <0.001  |
| 0–10                                                                  | 514 (0.9)             | 221 (0.9)            | 293 (0.8)          |         |
| 10–20                                                                 | 523 (0.9)             | 221 (0.9)            | 302 (0.9)          |         |
| 20–30                                                                 | 1973 (3.3)            | 873 (3.4)            | 1100 (3.2)         |         |
| 30–40                                                                 | 3211 (5.3)            | 1452 (5.7)           | 1759 (5.1)         |         |
| 40–50                                                                 | 5018 (8.3)            | 1967 (7.7)           | 3051 (8.8)         |         |
| 50–60                                                                 | 8584 (14.3)           | 3280 (12.9)          | 5304 (15.3)        |         |
| 60–70                                                                 | 9882 (16.4)           | 3702 (14.5)          | 6180 (17.8)        |         |
| 70–80                                                                 | 12351 (20.5)          | 4924 (19.3)          | 7427 (21.4)        |         |
| 80–90                                                                 | 13495 (22.4)          | 6202 (24.3)          | 7293 (21.0)        |         |
| >=90                                                                  | 4610 (7.7)            | 2645 (10.4)          | 1965 (5.7)         |         |
| Region†                                                               |                       |                      |                    | <0.001  |
| East Asia & Pacific                                                   | 3252 (5.4)            | 1117 (4.4)           | 2135 (6.2)         |         |
| Europe & Central Asia                                                 | 55453 (92.2)          | 23768 (93.3)         | 31685 (91.4)       |         |
| Latin America & Caribbean                                             | 162 (0.3)             | 67 (0.3)             | 95 (0.3)           |         |
| Middle East & North Africa                                            | 91 (0.2)              | 35 (0.1)             | 56 (0.2)           |         |
| North America                                                         | 926 (1.5)             | 413 (1.6)            | 513 (1.5)          |         |
| South Asia                                                            | 267 (0.4)             | 83 (0.3)             | 184 (0.5)          |         |
| Sub-Saharan Africa                                                    | 10 (0.0)              | 4 (0.0)              | 6 (0.0)            |         |
| Country income classification†                                        |                       |                      |                    | <0.001  |
| High income                                                           | 54888 (91.2)          | 23439 (92.0)         | 31449 (90.7)       |         |
| Upper middle income                                                   | 5003 (8.3)            | 1964 (7.7)           | 3039 (8.8)         |         |
| Lower middle or low income                                            | 270 (0.4)             | 84 (0.3)             | 186 (0.5)          |         |
| IQR, interquartile range                                              |                       |                      |                    |         |
| * Data are number (percent within columns) unless specified otherwise |                       |                      |                    |         |
| † According to World Bank classification [35]                         |                       |                      |                    |         |

644 **Table 2. Symptoms at presentation to hospital with Covid-19**

| Variable*                                                                      | Overall<br>n = 60 161 | Sex                  |                    | P-<br>value | Missing<br>data† |
|--------------------------------------------------------------------------------|-----------------------|----------------------|--------------------|-------------|------------------|
|                                                                                |                       | Female<br>n = 25 487 | Male<br>n = 34 674 |             |                  |
| Fever                                                                          | 41109 (68.4)          | 16663 (65.4)         | 24446 (70.5)       | <0.001      | 34 (0.1)         |
| Cough                                                                          | 40930 (68.1)          | 16696 (65.6)         | 24234 (69.9)       | <0.001      | 50 (0.1)         |
| Shortness of breath                                                            | 37577 (62.5)          | 15450 (60.7)         | 22127 (63.9)       | <0.001      | 78 (0.1)         |
| Fatigue                                                                        | 23319 (38.8)          | 9889 (38.9)          | 13430 (38.8)       | 0.903       | 120 (0.2)        |
| Confusion                                                                      | 13732 (24.1)          | 6108 (25.1)          | 7624 (23.4)        | <0.001      | 3196 (5.3)       |
| Diarrhoea                                                                      | 10061 (16.8)          | 4565 (17.9)          | 5496 (15.9)        | <0.001      | 114 (0.2)        |
| Nausea and vomiting                                                            | 9891 (16.5)           | 5099 (20.0)          | 4792 (13.8)        | <0.001      | 110 (0.2)        |
| Muscle pains                                                                   | 9472 (15.8)           | 3952 (15.5)          | 5520 (16.0)        | 0.167       | 124 (0.2)        |
| Anorexia                                                                       | 613 (13.3)            | 243 (12.2)           | 370 (14.1)         | 0.065       | 55552 (92.3)     |
| Chest pain                                                                     | 6953 (11.6)           | 3084 (12.1)          | 3869 (11.2)        | <0.001      | 118 (0.2)        |
| Headache                                                                       | 6154 (10.3)           | 2830 (11.1)          | 3324 (9.6)         | <0.001      | 136 (0.2)        |
| Abdominal pain                                                                 | 5305 (8.8)            | 2597 (10.2)          | 2708 (7.8)         | <0.001      | 123 (0.2)        |
| Sore throat                                                                    | 4880 (8.1)            | 2135 (8.4)           | 2745 (8.0)         | 0.046       | 243 (0.4)        |
| Severe dehydration                                                             | 3451 (7.2)            | 1562 (7.6)           | 1889 (6.9)         | 0.005       | 12166 (20.2)     |
| Wheeze                                                                         | 3845 (6.4)            | 1790 (7.0)           | 2055 (6.0)         | <0.001      | 246 (0.4)        |
| Joint pains                                                                    | 3229 (5.4)            | 1459 (5.7)           | 1770 (5.1)         | 0.001       | 141 (0.2)        |
| Altered sense of taste                                                         | 2011 (5.2)            | 924 (5.5)            | 1087 (5.0)         | 0.014       | 21598 (35.9)     |
| Altered sense of smell                                                         | 1733 (4.5)            | 819 (4.9)            | 914 (4.2)          | 0.001       | 21483 (35.7)     |
| Unable to walk                                                                 | 220 (4.4)             | 83 (3.8)             | 137 (4.7)          | 0.145       | 55106 (91.6)     |
| Rhinorrhoea                                                                    | 2382 (4.0)            | 1041 (4.1)           | 1341 (3.9)         | 0.193       | 244 (0.4)        |
| Skin ulcer                                                                     | 978 (1.9)             | 489 (2.2)            | 489 (1.6)          | <0.001      | 7924 (13.2)      |
| Haemorrhage                                                                    | 993 (1.7)             | 429 (1.7)            | 564 (1.6)          | 0.625       | 249 (0.4)        |
| Seizure                                                                        | 775 (1.4)             | 352 (1.4)            | 423 (1.3)          | 0.147       | 3221 (5.4)       |
| Lower chest wall indrawing                                                     | 688 (1.2)             | 235 (1.0)            | 453 (1.4)          | <0.001      | 3349 (5.6)       |
| Rash                                                                           | 694 (1.2)             | 287 (1.1)            | 407 (1.2)          | 0.612       | 130 (0.2)        |
| Lymphadenopathy                                                                | 307 (0.5)             | 147 (0.6)            | 160 (0.5)          | 0.081       | 3340 (5.6)       |
| Conjunctivitis                                                                 | 251 (0.4)             | 111 (0.4)            | 140 (0.4)          | 0.599       | 252 (0.4)        |
| Ear pain                                                                       | 201 (0.4)             | 107 (0.5)            | 94 (0.3)           | 0.002       | 5275 (8.8)       |
| <i>Composite categories</i>                                                    |                       |                      |                    |             | 314 (0.5)‡       |
| Fever plus one of cough or shortness of breath                                 | 35394 (59.1)          | 14174 (55.9)         | 21220 (61.5)       | <0.001      |                  |
| Fever plus one of cough, rhinorrhoea, shortness of breath, sore throat, wheeze | 36006 (60.2)          | 14466 (57.0)         | 21540 (62.5)       | <0.001      |                  |
| Cough or fever                                                                 | 50985 (85.2)          | 21033 (82.9)         | 29952 (86.9)       | <0.001      |                  |
| One or more of cough, shortness of breath, fever, muscle pain, sore throat     | 55198 (92.2)          | 22982 (90.6)         | 32216 (93.4)       | <0.001      |                  |

\* Data are number (percent of patients with non-missing data within columns) unless specified otherwise

†Number (percent of all patients)

‡Patients missing any symptom included in these criteria are omitted from the composite categories

646 **Table 3. Symptoms reported for patients meeting none of the clinical case definitions**

| Symptom*                  | Overall<br>n = 4649 | Age group (years) |               |                |                |                |                |                |                |                 |                | Missing<br>data |
|---------------------------|---------------------|-------------------|---------------|----------------|----------------|----------------|----------------|----------------|----------------|-----------------|----------------|-----------------|
|                           |                     | 0–<br>n = 41      | 10–<br>n = 74 | 20–<br>n = 178 | 30–<br>n = 188 | 40–<br>n = 183 | 50–<br>n = 309 | 60–<br>n = 494 | 70–<br>n = 981 | 80–<br>n = 1542 | 90–<br>n = 659 |                 |
| Confusion                 | 2158 (48.8)         | 5 (12.5)          | 3 (8.3)       | 7 (7.3)        | 11 (7.9)       | 26 (16.0)      | 62 (21.6)      | 178 (37.0)     | 528 (54.2)     | 897 (58.2)      | 441 (66.9)     | 230 (4.9)       |
| Fatigue                   | 1186 (25.5)         | 10 (24.4)         | 6 (8.1)       | 18 (10.1)      | 24 (12.8)      | 29 (15.8)      | 79 (25.6)      | 137 (27.7)     | 276 (28.1)     | 452 (29.3)      | 155 (23.5)     | 0 (0.0)         |
| Nausea and vomiting       | 1040 (22.4)         | 17 (41.5)         | 22 (29.7)     | 42 (23.6)      | 64 (34.0)      | 76 (41.5)      | 99 (32.0)      | 131 (26.5)     | 216 (22.0)     | 270 (17.5)      | 103 (15.6)     | 0 (0.0)         |
| Abdominal pain            | 844 (18.2)          | 6 (14.6)          | 21 (28.4)     | 49 (27.5)      | 71 (37.8)      | 54 (29.5)      | 87 (28.2)      | 117 (23.7)     | 173 (17.6)     | 195 (12.6)      | 71 (10.8)      | 1 (0.0)         |
| Diarrhoea                 | 631 (13.6)          | 7 (17.1)          | 6 (8.1)       | 22 (12.4)      | 21 (11.2)      | 29 (15.8)      | 49 (15.9)      | 97 (19.6)      | 148 (15.1)     | 187 (12.1)      | 65 (9.9)       | 1 (0.0)         |
| Severe dehydration        | 521 (12.7)          | 3 (9.1)           | 2 (5.9)       | 3 (4.1)        | 2 (1.8)        | 9 (6.8)        | 19 (7.6)       | 43 (9.9)       | 121 (13.2)     | 225 (15.2)      | 94 (14.7)      | 541 (11.6)      |
| Headache                  | 300 (6.5)           | 1 (2.4)           | 6 (8.1)       | 32 (18.0)      | 27 (14.4)      | 32 (17.5)      | 24 (7.8)       | 45 (9.1)       | 53 (5.4)       | 54 (3.5)        | 26 (4.0)       | 2 (0.0)         |
| Chest pain                | 295 (6.3)           | 0 (0.0)           | 0 (0.0)       | 8 (4.5)        | 11 (5.9)       | 19 (10.4)      | 49 (15.9)      | 49 (9.9)       | 46 (4.7)       | 83 (5.4)        | 30 (4.6)       | 0 (0.0)         |
| Haemorrhage               | 259 (5.6)           | 0 (0.0)           | 1 (1.4)       | 6 (3.4)        | 11 (5.9)       | 14 (7.7)       | 15 (4.9)       | 25 (5.1)       | 48 (4.9)       | 95 (6.2)        | 44 (6.7)       | 1 (0.0)         |
| Joint pain                | 197 (4.2)           | 1 (2.4)           | 3 (4.1)       | 2 (1.1)        | 5 (2.7)        | 7 (3.8)        | 7 (2.3)        | 16 (3.2)       | 33 (3.4)       | 86 (5.6)        | 37 (5.6)       | 1 (0.0)         |
| Seizure                   | 181 (4.1)           | 5 (12.5)          | 3 (8.3)       | 6 (6.2)        | 7 (5.0)        | 13 (8.0)       | 17 (5.9)       | 27 (5.6)       | 35 (3.6)       | 52 (3.4)        | 16 (2.4)       | 230 (4.9)       |
| Skin ulcer                | 169 (4.0)           | 1 (3.0)           | 0 (0.0)       | 0 (0.0)        | 0 (0.0)        | 3 (2.0)        | 10 (3.6)       | 12 (2.6)       | 49 (5.2)       | 57 (3.8)        | 37 (5.7)       | 379 (8.2)       |
| Altered sense of<br>smell | 118 (3.3)           | 0 (0.0)           | 14 (19.4)     | 40 (25.8)      | 24 (15.2)      | 13 (8.8)       | 8 (3.4)        | 10 (2.6)       | 2 (0.3)        | 7 (0.6)         | 0 (0.0)        | 1029 (22.1)     |
| Rhinorrhoea               | 137 (2.9)           | 2 (4.9)           | 21 (28.4)     | 44 (24.7)      | 27 (14.4)      | 18 (9.8)       | 11 (3.6)       | 8 (1.6)        | 1 (0.1)        | 2 (0.1)         | 3 (0.5)        | 0 (0.0)         |
| Altered sense of<br>taste | 74 (2.0)            | 1 (2.9)           | 4 (5.6)       | 23 (14.8)      | 9 (5.7)        | 7 (4.8)        | 1 (0.4)        | 7 (1.8)        | 8 (1.1)        | 11 (0.9)        | 3 (0.6)        | 1029 (22.1)     |
| Rash                      | 80 (1.7)            | 6 (14.6)          | 3 (4.1)       | 2 (1.1)        | 2 (1.1)        | 5 (2.7)        | 6 (1.9)        | 13 (2.6)       | 18 (1.8)       | 17 (1.1)        | 8 (1.2)        | 2 (0.0)         |
| Wheeze                    | 62 (1.3)            | 0 (0.0)           | 0 (0.0)       | 1 (0.6)        | 0 (0.0)        | 0 (0.0)        | 3 (1.0)        | 7 (1.4)        | 13 (1.3)       | 26 (1.7)        | 12 (1.8)       | 0 (0.0)         |

\* Data are number (percent of patients with non-missing data within columns). Symptoms experienced by <25 individuals are omitted.

647

648

649

## Figure legends

### **Figure 1. Flow of participants in this analysis.**

4C, Coronavirus Clinical Characterisation Consortium; CCC, Critical Care Consortium; ISARIC, International Severe Acute Respiratory and emerging Infection Consortium; REDCap, Research Electronic Data Capture; SARS-CoV-2, severe acute respiratory syndrome coronavirus-2.

### **Figure 2. Age-specific prevalence of symptoms at hospital admission.**

### **Figure 3. Proportions meeting clinical criteria at hospital admission stratified by 10-year age band.**

Black boxes show the proportion of individuals, with error bars showing 95% confidence intervals calculated using the Clopper–Pearson method. The size of each box is inversely proportional to the variance, so larger boxes indicate greater certainty. Grey boxes with 95% confidence intervals show the proportions in the sensitivity analysis excluding patients recruited in the United Kingdom. ‘Respiratory symptom’ is any of cough, rhinorrhoea, shortness of breath, sore throat or wheeze. Patients missing a symptom included in any criteria are excluded from all four plots.

### **Figure 4. Odds of symptoms among patients admitted to hospital with Covid-19, stratified by age and sex.**

Each plot is the result of a logistic regression with a symptom as an outcome. Fixed effects of age in ten-year bands (baseline group 50–60 years) and sex are shown in black boxes with 95% confidence intervals. The size of each square is inversely proportional to the variance of the log odds ratio, so larger boxes indicate greater certainty. Clustering by country is included as a random intercept and

heterogeneity is depicted by circles showing the median odds ratio.

**Figure 5. Age- and sex- specific odds of meeting clinical definitions among patients admitted to hospital with Covid-19, stratified by age and sex.**

Each plot is the result of a logistic regression with a composite group of symptoms as an outcome.

Fixed effects of age in ten-year bands (baseline group 50–60 years) and sex are shown in black boxes

with 95% confidence intervals. The size of each square is inversely proportional to the variance of

the log odds ratio, so larger boxes indicate greater certainty. Clustering by country is included as a

random intercept and heterogeneity is depicted by circles showing the median odds ratio.

‘Respiratory symptom’ is any of cough, rhinorrhoea, shortness of breath, sore throat or wheeze.

Patients missing a symptom included in any criteria are excluded from all four plots.

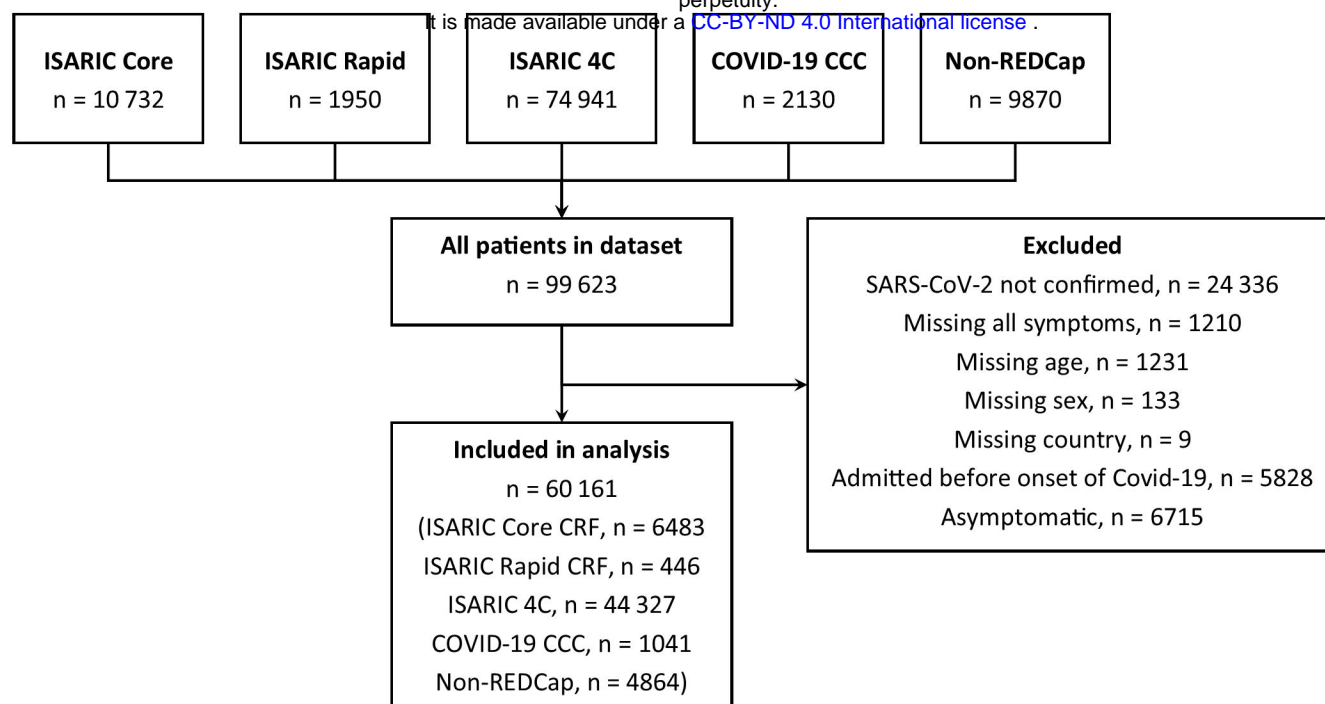

Fever

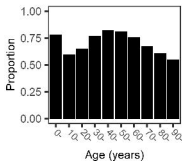

Cough

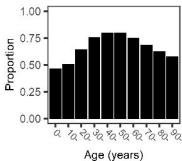

Shortness of breath

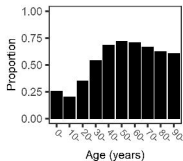

Fatigue

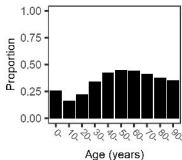

Confusion

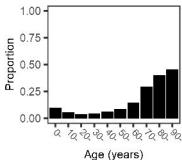

Nausea &amp; vomiting

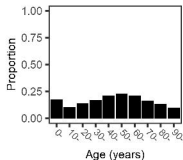

Diarrhoea

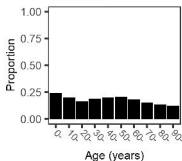

Muscle pains

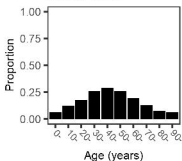

Chest pain

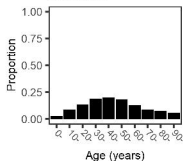

Headache

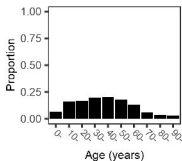

Abdominal pain

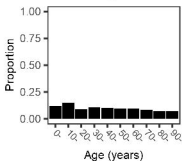

Sore throat

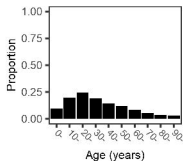

Fever plus cough or shortness of breath

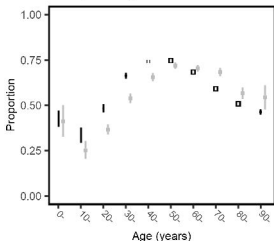

Fever plus respiratory symptom

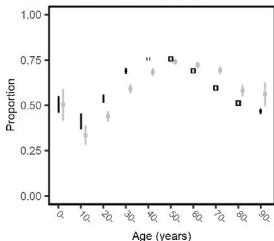

Cough or fever

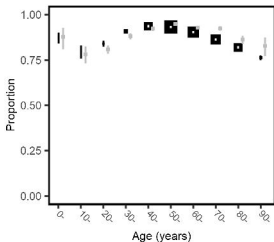

Cough, short of breath, fever, muscle pain, or sore throat

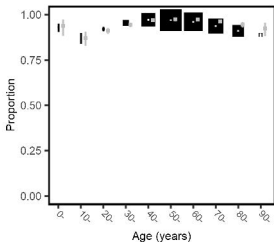



Fever

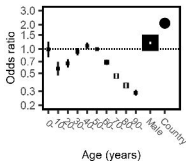

Cough

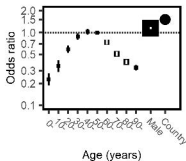

Shortness of breath

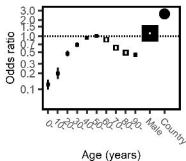

Fatigue

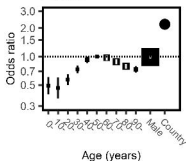

Confusion

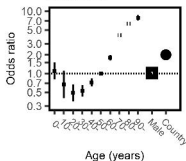

Nausea &amp; vomiting

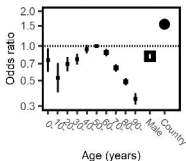

Diarrhoea

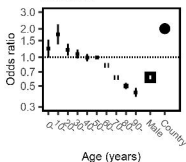

Muscle pains

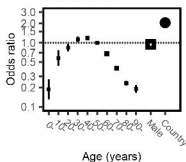

Chest pain

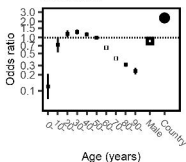

Headache

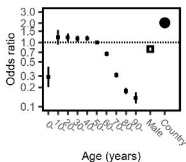

Abdominal pain

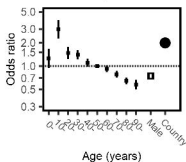

Sore throat

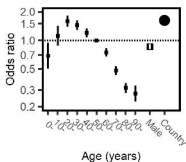

Fever plus cough or shortness of breath

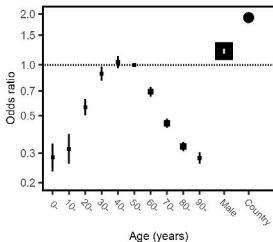

Fever plus respiratory symptom

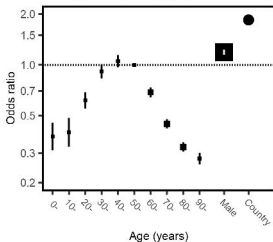

Cough or fever

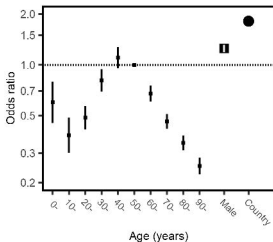

Cough, shortness of breath, fever, muscle pain, or sore throat

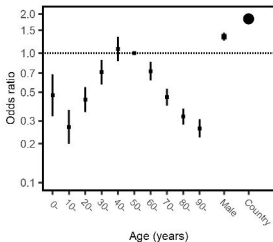

Source: https://medrxiv.org/content/10.1101/2020.10.26.20219519v1.full.pdf
